# Supplementary material for: Cross-species Transcriptomics Analysis Highlights Conserved Molecular Responses to Per- and Polyfluoroalkyl Substances (PFAS)
Source: Preprints.org preprint supplement (doi:10.20944/preprints202306.0413.v3), 2023-06-28
Supplement: Supplementary file 3 [file SupplementaryFileS1.xlsx]

## Sheet: Contrasts
Species	Dataset	Contrast	N. of differentially expressed genes (p-value ≤ 0.05)	Genes
Mus musculus	Attema et al. 2022	Wildtype mouse, PFOA 0.05 mg/kg body weight/day	1367	Cyp3a11,Slc35f2,Sort1,Tmem86a,Cyp39a1,Pls1,Cyp4a14,Mfap3l,Myo15b,Sdcbp2,Tpm2,Serpina12,Niban2,Cib3,Nat8,Cyp3a59,Galk1,Dqx1,Cyp4a31,Klhdc7a,Hsd3b5,Cyp4a10,Tmem97,Sdr9c7,Gm2788,Acaa1b,Gal3st1,Adam11,Abca8a,Alpl,Ggt6,Gm45792,Pigr,Gipc2,Nagk,Krt23,Slc16a5,Serpina1e,Steap2,Akr1c20,Keg1,Gsta2,Gstt3,Slc51b,Gtdc1,Cyp4f14,Hamp,Gabbr2,Cyp2c55,Fkbp1a,Id1,Rdh16,Sema4a,Plod1,Igfals,Trhde,Ehhadh,Sema3b,E2f8,Zk…
Mus musculus	Attema et al. 2022	Wildtype mouse, PFOA 0.3 mg/kg body weight/day	3699	Cyp4a31,Cyp4a14,Arhgap27,Cyp4a10,Slc27a1,Myo15b,Krt23,Adam11,Retsat,Trpm4,Ctse,Ehhadh,Lpl,Abcd3,Cyp4a32,Ces1b,Hsd17b11,Hsd11b1,Sdr9c7,Pex11a,Acot2,Acox1,Abhd6,Acaa1b,Dsg1c,B430212C06Rik,Hadhb,Crat,Slc35f2,Mfap3l,Acot1,Ntrk2,Decr1,Lrtm1,Peg3,Eci1,Abcc4,Vnn1,Acad12,Gm15441,Ptp4a3,Aldh3a2,Aatk,Gnai1,Serinc2,Plxnb1,Tnfaip8l1,Slc22a5,Cyp3a11,Apol9a,Akr1c20,Decr2,Gstt2,Sdcbp2,Hsdl2,Cbfa2t3,Ucp2,Col27a1…
Mus musculus	Attema et al. 2022	Wildtype mouse, GenX 0.3 mg/kg body weight/day	1246	Cyp4a14,Cyp4a31,Slc27a1,Cyp4a10,Ehhadh,Krt23,Acot1,Serpina12,Retsat,B430212C06Rik,Hsd17b11,Lrtm1,Acot2,Gm15441,Ctse,Crat,Chrna2,Serinc2,Acaa1b,Pex11a,Adam11,Cyp4a32,Golm2,Eci1,Lepr,Acox1,Ech1,Peg3,Hbb-bt,Abhd6,Abcd3,Decr1,Hadhb,C4bp,Vnn1,Sdr9c7,Pctp,Aldh3a2,Slc22a5,Ptp4a3,Slc35f2,Ucp3,Slc16a13,Smo,Hbb-bs,Ces1b,Hba-a1,Extl1,Gm31600,Hba-a2,Apol9a,Gulo,Trpm4,Decr2,Scnn1g,Paqr7,Acsl1,Med12l,Cidea,Txn…
Mus musculus	Attema et al. 2022	Knockout mouse, PFOA 0.05 mg/kg body weight/day	998	Cyp3a11,Cyp2d41-ps,Pik3c2g,Rarres1,Gm20458,Cyp39a1,Slc13a5,Flvcr2,Smpd3,Tmem86a,Neu1,Nat8f7,Steap2,Cyp2c55,Srgap3,Evc,Peg3,Cyp4a31,Gse1,Ifi27l2b,Nsmf,Npnt,Tmie,Sort1,Slc2a4,mt-Nd3,Fam81a,Plekhg5,Myo15b,Tat,Rara,Cyp2d12,Phlda2,Man2b2,Icam1,Rpl10a-ps1,Fndc4,Trpc2,Pwwp4c,Gm45799,Lims2,Gipc2,Pls1,Adam11,Crybg1,P2rx4,Rragd,Avpr1a,Pklr,Spire2,Lad1,Phlda3,Espn,Atf5,Cyp2c65,Hipk2,Gm47164,Cda,Cln6,Cyp2b10…
Mus musculus	Attema et al. 2022	Knockout mouse, PFOA 0.3 mg/kg body weight/day	2244	Cyp2c55,Cyp3a11,Cyp2b10,4931406C07Rik,Cyp2c50,Ces2c,Rarres1,Cyp2c37,Cyp2c54,Cyp39a1,Cyp2c53-ps,Cyp2d41-ps,Peg3,Cyp2c65,Lrtm2,Ces2a,Cyp2a5,Ugt2b34,Cyp2d12,Por,Gm42577,Atf5,Cyp2c66,Cyp4f15,Gpcpd1,Gm49980,Cyp2c29,Ugt1a1,Cyp4a12b,Orm3,Cnmd,Acsl1,Cyp4a31,Zfp992,Cyp2c23,Gm10419,Cyp3a59,Gstt3,Abcc4,Serpina7,Abcc3,Smpd3,9130409I23Rik,Slc22a18,Gsta2,Cntnap1,Cyp3a13,Gm36041,Cyp2d9,mt-Nd3,Ntrk2,Inmt,Cyp4a32…
Mus musculus	Attema et al. 2022	Knockout mouse, GenX 0.3 mg/kg body weight/day	333	Zxdb,Mt1,Rarres1,Cyp26a1,Gm47036,Cxxc5,Il6ra,Usp6nl,Gm47457,Zfp968-ps,Gm21983,mt-Nd3,Maff,Kdm6b,Per1,Rara,Serpina4-ps1,Gm13775,Foxq1,Cyp21a2-ps,Gne,Fam161a,Mdm1,Pwwp4c,Tacc2,Slc27a1,Srrm4,Slc8b1,Gm45713,Ahdc1,Nab2,Pcdhga2,Mfap1a,Myl9,Errfi1,Kif12,Antxr1,Serpina3n,Adam11,Gm31235,Gm53019,Gse1,Lockd,Wdr81,Gm36936,Rps4l,Gm13169,Rora,Gm5417,Phlda1,Map1b,Atxn2,Baiap2,Ptafr,Cables1,Mov10,Retreg1,Dcaf6,P…
Mus musculus	Heintz et al. 2022	HFPO-DA 0.1 mg/kg	550	Gstm2 Rnf187 Olfr54 Nfic Acaa1a Bace2 Spr Abcc2 Maco1 Ehhadh Ighv1-80 Rnf2 Ccdc28a Adgrl4 Cxcl1 Pla2g6 Rnf141 Gspt1 Hsd17b11 Pvrig 0610040J01Rik Lrr1 Chst11 Rpl18a Rnf145 Axin2 Gpr25 Pla2g12b Tbc1d9 Ccdc134 Ets1 Ubr5 Gimap1 Ppp6c Rhog Ctsg Lynx1 Col13a1 Mrgprb3 Steap2 Resf1 Leap2 Gpr75 Ndufa6 Gorasp2 Prpf39 Ppid Gpr39 Urod Nudt4 Tsc1 Tmem248 Hsd3b7 Cpox Olfr129 Wdr36 Cd3d Atp11a Borcs5 Abhd17a Ap…
Mus musculus	Heintz et al. 2022	HFPO-DA 0.5 mg/kg	815	Ehhadh Cyp4a14 Cyp4a31 Cyp4a10 Eci1 Retsat Acaa1b Hsd17b11 Acaa1a Acot1 Hadha Fabp1 Aldh3a2 Hadhb Pex11a Abcd3 Acox1 Decr1 Eci2 Abhd6 Cyp4a32 Aldh1l1 Serinc2 Slc25a20 Dhrs4 Acadm Acadvl Slc27a1 Hsdl2 Ephx2 Sar1b Lect2 Suclg1 Mmadhc Lpl Gale Cpox Lpcat3 4931406C07Rik Acsl1 Fgfr3 Dbi Mpp1 Adgrl4 Gstm2 Fam213a Rpl18a Fut10 Abcc2 Adam11 Cdo1 Bace2 Rnf141 Rnase4 Ten1 Col13a1 Adipor2 Aldh1a1 Etfdh Nduf…
Mus musculus	Heintz et al. 2022	HFPO-DA 5 mg/kg	2542	Ehhadh Hsd17b11 Cyp4a31 Eci1 Cyp4a14 Slc27a1 Retsat Cpt1b Acaa1b Hadhb Acaa1a Aqp3 Acot1 Pex11a Fabp3 Serinc2 Acox1 Decr1 Cox6b2 Cyp4a10 Acadm Aldh3a2 Abhd6 Ces1c Fabp1 Lpl Ucp2 Hadha Cyp4a32 Slc25a20 Plin2 Dbi Scd2 Ugt2a3 Mpp1 Crat C1s1 Cyp1a2 Eci2 Prodh Casc4 Acot2 Acadl Mgll Nol3 Pla2g6 Ass1 F11 Serpina11 F7 Me1 Serpina1e Sptlc3 Abcd3 Pctp Gnmt Spon2 Osbpl3 Ccnd1 Amy1 Ten1 Cyp2c54 Hsdl2 Ppib G…
Mus musculus	Pfohl et al. 2021	High fat diet, PFNA	2190	Cyp4a12b,Cyp4a12a,Cyp2b10,Krt23,Pla2g6,Sulf2,Serpina1e,Alpl,Zfp97,Vmn1r24,Mup21,Smad9,LOC100504898,P2ry1,Acot3,Slc35f2,Ces2c,Igtp,Gm13238,Srd5a1,Inmt,Adam11,Cisd3,LOC100503226,1700080G11Rik,Vac14,Serpina12,Igfbp2,Acot1,0610008F07Rik,Lipg,Cxcl9,Gm5595,Poli,Lipe,Cyp3a41a,Pnpla2,Ccl22,Cyp2c55,Cyp2c39,Ly6c2,Adck5,Plk2,Wnt10a,Hist1h2al,Cyp3a41b,Gsta4,Irgm1,Nmrk1,Cyp4f15,Slc10a2,Rnase13,Tsc22d3,AW54954…
Mus musculus	Pfohl et al. 2021	High fat diet, PFOS	3492	Hsd3b5,Sptlc3,Mogat1,Ctse,Txnip,Ehhadh,Slco1a4,Acot2,Fabp4,Krt23,Cyp4a31,Acot3,Cyp39a1,Sulf2,Serpina12,Ddhd2,Pigr,BC090627,Sdr9c7,Slc27a1,Slc39a5,Pdk4,Smad9,Acot1,Cyp4a12b,1700080G11Rik,Slc22a3,Dgkh,Ucp3,Prlr,Casc4,Ifit1,Pnliprp1,Serinc2,Gstt2,Hsd17b11,Slco1a1,Serpina3m,Cyp2b10,Cyp4a12a,Slc18a1,Fbp2,Hprt,Slc22a30,Mup6,Otop1,Abcg2,Igtp,5730469M10Rik,Hsd3b4,Myo15b,Rdh16,Pnpla2,Tmtc2,Klhl7,Adam11,Sl…
Mus musculus	Pfohl et al. 2021	Low fat diet, PFNA	3616	Cyp2b10,Snora73b,Snora73a,Gstt3,Cyp2c55,Alg3,Krt23,Ces2e,Snora16a,Gsta4,Serpinb1a,Aacs,Pm20d1,Ppif,Gstm3,Snord35b,9130409I23Rik,Cyp17a1,Snord92,Vac14,Ces2c,Ctse,Snord17,Cyp2c53-ps,Slc35f2,Lims2,Slc18a1,Gm2573,Cd37,Zwint,Cntnap1,Slc39a4,Pla2g6,1300015D01Rik,9430037G07Rik,Plk2,Ucp2,Cgref1,Gm3776,Pigs,Fgfr3,Acd,Gm19316,LOC100503226,LOC100862183,Cyp4a12a,Tmem170,Tmem43,Cyp3a41a,Pparg,Map1lc3b,Cyp3a44…
Mus musculus	Pfohl et al. 2021	Low fat diet, PFOS	2621	Mir101c,Ces2c,Cyp2b10,9130409I23Rik,Gsta4,Cyp2c55,Cyp17a1,Slc35f2,Ucp2,Tpm2,Slc18a1,Krt23,Gstm3,Ctse,Pla2g6,Efha1,Slc39a4,Gm3776,Cyp3a44,Serpinb1a,Cyp4a12a,Pyroxd2,2610528J11Rik,Snora30,C730002L08Rik,Aox1,Uap1l1,Pltp,Plk2,Cyp3a41a,Zwint,AW549542,Tlr3,Ces2e,Sulf2,Aldh1a7,Cyp3a41b,Pnpla2,Thrsp,Treh,Gm10639,Adhfe1,Acad10,Serpina11,Als2cr12,Abhd6,Srebf1,Gal3st1,F3,Hexb,Ephx1,Cyp2b9,Mcm2,Gm19617,Scamp…
Homo sapiens	Imir et al. 2021	Control diet, PFOS 10mg/kg	187	ELMO3,PODXL,UNC45B,PLXNA2,VPS13B,LOC729451,DDX5,ITPR3,NSA2,PTRH2,LOC105372031,APEX1,LOC105374187,MRPL16,TMEM190,RAB1A,FAM83C-AS1,BCAS4,HSP90AA1,WDR3,FAM83A-AS1,PAN3,SBF1,LOC105376405,LOC107985302,NAPSA,FBXL2,SEPTIN11,AGO1,LOC102724102,C3orf38,PSMA3,SIRT1,LOC105371573,TYW5,BRPF1,MYL6B,FAM166B,EMC4,SNRPF,THSD4-AS1,ZNF516-AS1,SLC30A4,KAZALD1,LOC105371022,LOC105373271,RHBDL1,DTNBP1,LOC105371081,BRSK1…
Homo sapiens	Imir et al. 2021	Fat diet, PFOS 10mg/kg	619	LOC105371816,DDX5,WDR3,RAB1A,RPS4X,AMPD3,RPL35,ADGRB2,RTL1,SIRT1,LOC105376405,LOC105372031,CAB39L,RIF1,NMNAT2,FKBP1B,PLXNA2,PACRG,TSSK6,EDRF1-AS1,IGF2BP3,SIX1,FBXL2,APEX1,C5orf58,ABCA1,SEPTIN11,LOC729451,ELMO3,XPA,DTNBP1,TSPAN1,SEC61G,LOC105374746,TMEM91,HEPHL1,TMEM243,HSBP1L1,EIF3G,C1orf195,LRRC37A2,PCCA-AS1,EMC4,LOC105377713,PDPK1,BEGAIN,BAG4,TAX1BP1,VPS13B,MLF2,CD63,TADA1,C3orf38,MACF1,MLST8,M…
Homo sapiens	Rowan-Carroll et al. 2021	Day 1, PFOS 20 μM	621	IDI1,MSMO1,HMGCR,ACAT2,INSIG1,EIF4EBP1,PLIN2,CYP51A1,CYP2E1,TNFSF10,CIDEC,FMO5,GCLM,GGH,EBP,FMO3,CYP7A1,FABP1,HSPD1,TRIB3,LDLR,FMO1,FASN,CDK4,DPYS,POR,CYP4F2,CYP3A5,CNN3,GSTA2,CYP3A4,HSPE1,SAT1,SQSTM1,TXNRD1,HIST1H2BD,AGXT2,CCL15,HPR,TSKU,LAP3,DDC,FDFT1,ABCB1,SLC1A2,ARHGEF2,LSS,PLP2,IFITM1,FN1,UGT2B7,NR1I3,AHSA1,MAFF,EEF2,MRPL15,THEM4,CFHR1,HP,COL16A1,SLC51A,DDIT3,GHR,SLC2A2,ALAS1,SMAD5,AMY2B,SLC…
Homo sapiens	Rowan-Carroll et al. 2021	Day 4, PFOS 20 μM	588	PLIN2,CYP51A1,EBP,HMGCR,MSMO1,CYP7A1,FMO3,CYP3A5,IDI1,DPYS,ACAT2,TTR,GGH,CYP3A4,FN1,INSIG1,CYP2E1,CYP4F2,UGT2B7,SLC27A2,SLC22A1,APOA1,TNFSF10,FMO5,ALAS1,GSTA2,HIST1H2BD,LSS,SLC1A2,GDF15,BCL2L1,MASP2,EEF2,HPR,POR,DDC,HP,EIF4EBP1,FDFT1,CIDEC,ALB,SAT1,ARRDC4,HADHA,AGXT2,A2M,CYP2A6,IFITM1,SLC10A1,NR1I3,NME1,PEG10,CCL15,ADH1A,FKBP5,ETFA,RPL8,FASN,TIMP1,SLC51A,DHCR7,RPL19,CYP4A11,EPHX2,CDK4,TRIB3,RPL3,…
Homo sapiens	Rowan-Carroll et al. 2021	Day 10, PFOS 20 μM	806	HP,TTR,ACAT2,HPR,INSIG1,DPYS,SLC22A1,CFHR1,CYP51A1,ALB,PLIN2,HMGCR,CYP7A1,CYP4F2,MSMO1,GCLM,GDF15,C1R,CYP3A4,SLC10A1,EEF2,NR1I3,FASN,TXNRD1,ADH1B,ADH1A,EIF4EBP1,IDI1,ABCA6,TNFSF10,CYP2E1,CYP4A11,FMO3,EPHX2,SAA1,SLC2A2,RPL29,IGFBP1,RPL28,A2M,GGH,C1S,TRIB3,SLC22A7,CCL15,CD55,EBP,CYP4A22,FMO5,APOA1,PEG10,SCP2,TMEM97,CYP3A5,EEF1B2,RPL19,RPL8,FGB,GHR,AKR1B10,RPLP0,CYP2A6,FN1,F2,AKR1C3,UGT2B7,SQSTM1,RP…
Homo sapiens	Rowan-Carroll et al. 2021	Day 14, PFOS 20 μM	714	PLIN2,NR1I3,CYP2A6,MSMO1,BAAT,TTR,C1S,GGH,IDI1,CYP3A4,SLC22A1,TXNRD1,GCLM,SQSTM1,DPYS,ABCA6,FMO5,CYP4F2,EBP,INSIG1,TMEM97,CYP2E1,ADH1B,SLC22A7,ADH1A,CYP51A1,POR,UGT2B7,FDFT1,SLC10A1,ALB,CNN3,CYP7A1,FGF2,SCP2,SLC2A2,MAOB,FN1,EPHX2,ACAT2,F2,EEF1B2,CYP3A5,C1R,ARHGEF12,GDF15,HSPD1,PDHB,PANK3,ARF4,RPL35,HP,AKR1B10,CFH,FOXA1,TST,EIF4EBP1,FMO3,FASN,GHR,PROS1,ITGA1,CFHR1,PIK3R1,CD3D,CAT,BPHL,CD55,CXCL2,S…
Homo sapiens	Rowan-Carroll et al. 2021	Day 1, PFOA 20 μM	233	FABP1,PLIN2,ACSL1,HADHA,TUBB2A,ACADVL,NDRG1,CYP4A11,ACOX1,PHGDH,GSTA2,SLC27A2,HMGCS2,CYP4A22,SGK2,ACADM,ACSL5,CNN3,FGFR2,PLIN1,IGFBP1,SLC1A2,H1F0,POR,TNFSF10,TRIB3,ABCC3,LYRM1,DDIT3,SLC10A1,GOT1,ETFA,GGH,GCLM,ADH1A,UGT2B7,GJB2,DSG2,ADH1B,PPARA,AQP9,GADD45A,PRSS23,FPGS,ABHD6,PEX11A,MAFF,CIDEC,DDC,GSTA5,IDI1,COL16A1,TMEM50A,HSPD1,EIF4EBP1,S100B,THEM4,FMO1,LCN2,ATF5,VEGFA,IL2RG,UGT1A9,TST,FMO5,SLC1A…
Homo sapiens	Rowan-Carroll et al. 2021	Day 4, PFOA 20 μM	227	PLIN2,HMGCS2,CYP4A11,SLC27A2,HADHA,CYP4A22,CYP7A1,SLC1A2,ACSL1,CYP2A6,ETFA,FN1,ACADVL,CIDEC,ACADM,FABP1,UGT2B7,ARRDC4,CYP2B7P,LYRM1,COL3A1,CYP51A1,ACOX1,GSTA2,FMO5,NDRG1,HMGCR,FGFR2,ECH1,SULT1B1,GGH,ACSL5,SLC10A1,ACAT1,TTR,ATF5,COL11A1,SGK2,TUBB2A,ETFB,ADH1A,CAV1,SNAI2,ACAT2,DPYS,PHGDH,BMF,FAH,UGDH,TMEM97,KHDRBS3,IFIT2,UQCRC1,IDI1,POR,GCLC,MSMO1,GADD45A,TNFSF10,IFIT1,EBP,CDA,AQP9,F5,SLC22A1,PEX11…
Homo sapiens	Rowan-Carroll et al. 2021	Day 10, PFOA 20 μM	367	HMGCS2,PLIN2,CYP4A22,CYP4A11,FABP1,FN1,SLC27A2,ACAT1,HADHA,ACSL1,ACADVL,ACOX1,CIDEC,CYP7A1,ETFA,SGK2,FGFR2,TST,TUBB2A,CAT,ACAT2,ATF5,SLC22A1,CYP51A1,SLC10A1,TTR,ALDH2,FMO5,TIMP1,PVR,PCCB,TNFSF10,ARRDC4,SULT1B1,RPL15,TMEM97,LYRM1,CRP,GADD45A,ECH1,ACSL5,HMGCR,TMBIM6,ATP5B,ASS1,UGT1A6,GSTA5,ACADM,ADH1B,NDRG1,UGT2B7,ADH1A,MAP2,BMF,AQP9,CYP2A6,ETFB,SOX4,ISOC1,CLIC4,GSTA2,CNN3,UQCRC1,COL3A1,CA2,MSMO1,A…
Homo sapiens	Rowan-Carroll et al. 2021	Day 14, PFOA 20 μM	285	CYP4A22,HMGCS2,PLIN2,CYP4A11,HADHA,SLC27A2,ACSL1,ACADVL,FN1,POR,ACADM,ACAT1,ECH1,ETFA,GGH,ACOX1,NDRG1,CIDEC,SGK2,TUBB2A,HSPD1,SLC10A1,ETFB,PHGDH,LYRM1,CCL2,ASS1,FABP1,RPL19,GCLM,EEF1B2,TST,MRPL19,PLS1,SNAI2,CYP2A6,CLIC4,TP53I3,FGG,AQP9,H1F0,DAXX,ATF5,SERPINE1,FGB,SULT1B1,PARP14,EEF2,UGT2B7,BMF,CNN3,SOX4,CXCL2,ACSL5,RPS25,FOLH1,TPM1,ALDH2,GADD45A,CXCL1,FAH,HADH,SLCO2B1,TIMP1,ANXA2,RPL26,COL5A2,PTG…
Homo sapiens	Rowan-Carroll et al. 2021	Day 1, PFBS 20 μM	89	AQP1,IGFBP1,KRT7,SMAD3,EFCAB14,SERPINE1,TPM1,HIKESHI,RECQL,NR2F1,KRT19,EIF2S2,KLF5,ALDH3A2,ARHGAP8,SRP72,FABP1,UBE2J1,LAMB3,PIK3R4,PTEN,FGFR2,SAMHD1,ILK,LDLR,CRYZ,EPS8L3,TCEAL4,HAVCR1,CALM1,DHDDS,NOL3,CCL5,ANKRD20A13P,CYP4A22,USH1C,XCL2,MOK,CBWD6,ACADVL,POLR2H,KHDRBS3,STX4,MCM10,CAV1,HSP90AA1,FASLG,TBPL1,NCK1,ATF1,BECN1,HIST1H2BN,MTA1,IER2,DCN,VAV3,GRWD1,LRRFIP2,APOBEC3G,SERPINE2,CST1,AREG,NUP62,…
Homo sapiens	Rowan-Carroll et al. 2021	Day 4, PFBS 20 μM	109	CBR3,TMBIM6,GABRB3,ABCB11,TMEM50A,SLC6A8,MYC,RPL22,FN1,PSEN1,TBPL1,PRSS23,ADORA2A,IGFBP3,COL8A2,SQRDL,SRC,PPP2R1A,ACE2,FAM96A,F5,ELOVL2,H2AFX,PCM1,ORMDL2,LIMS4,RRP1B,ACP1,RNPS1,PTPN12,CASP9,EI24,GTF2A2,ZDHHC16,RAB1A,ST6GALNAC2,RGR,BTK,RNASE6,AIFM1,GOLT1B,GSTA5,GMPR2,POP5,IGFBP1,PEG10,SFTPA1,RAE1,CTGF,HSPA6,PTPRCAP,EFCAB14,UBE2V2,PNKP,PUS1,FASTKD5,DNA2,SGPP1,PLEKHJ1,ASAH1,PSEN2,IFNAR1,ATP5B,STOML2…
Homo sapiens	Rowan-Carroll et al. 2021	Day 10, PFBS 20 μM	222	COL1A2,CYP4A22,CYP4A11,HLA-A,B2M,HLA-B,F3,PLIN2,COL6A3,ORMDL2,IDE,BCL2A1,SLC15A3,EFCAB14,SEMA5A,MYO10,ACAT1,MYL9,VRK1,SACM1L,MRPL53,SLA,COL5A1,CA2,TP53BP2,FIG4,ATF5,COG7,KLRC2,ZNF586,MMP9,KIF2C,APOA1,ECI1,B3GNT2,CCL22,SRXN1,KTN1,FOXO4,ACSL1,COL1A1,TST,PLP2,ITGB1BP1,MAPK3,MAPT,TRAM2,FERMT2,RANBP2,RAC2,CEP55,HIST1H3H,SPP1,TUBB6,RPL35,IKBIP,ANXA2,IGFBP3,GNAS,RHOA,CCL3,COQ5,RBKS,ITGA1,ITGB2,WDR61,SNX…
Homo sapiens	Rowan-Carroll et al. 2021	Day 14, PFBS 20 μM	142	ZNF367,PMM2,SIRT3,FGG,CXCL2,FGB,AATF,NRAS,NOC3L,CCT5,LSM5,MAL2,TNIP1,CXCL1,TREM1,LSR,PTK2,H1F0,TJP1,PRDX1,SNX7,DDR1,GDF15,MUC1,CCL2,GTPBP8,CYP4A22,EEF1G,IGFBP3,EXT1,ACAT2,HMGCS2,CCT6A,EPHX2,SLCO1B1,FAM96A,RAB1A,ALDH9A1,ACAT1,ASF1A,NOL3,MYC,ANXA8L1,SCP2,NME1,GNB1,HTRA1,C5,ACBD3,A2M,TMEM97,PP7080,TMCO1,EBP,MX1,LRP10,CSRP1,ATF6,FPGS,ETFB,PGRMC1,GPI,COL16A1,DFFB,HIST1H2BB,BLCAP,VEGFA,CXCL8,TTC17,ACSL…
Homo sapiens	Rowan-Carroll et al. 2021	Day 1, PFDS 20 μM	321	IDI1,MSMO1,INSIG1,CYP51A1,HMGCR,ACAT2,TPM1,MT2A,EBP,FASN,SHB,SLC51A,PNKP,ID1,VEGFA,CNN3,ARHGAP8,GOT1,ABCC5,FDFT1,MT1G,SULT2A1,BCL2L1,CYP2E1,ABCC2,MLLT11,TMEM97,SLC13A5,MT1H,TNFSF10,MT1M,SLC1A2,FGFR2,ABCC3,PPARG,HIST2H2AA4,MAT2A,LDLR,PITPNA,SMA5,DNAJB9,PVR,AMDHD2,ZNF367,TMEM2,ACSL1,CTGF,GGH,GTF2H2C,DHCR7,ACADVL,CRIM1,ATF5,LAP3,GSTA2,ELOVL6,CMPK2,NR1H4,DSG2,CD55,STAP2,HSPA5,MPC2,PRDX1,EPS8L3,CYP7A1…
Homo sapiens	Rowan-Carroll et al. 2021	Day 4, PFDS 20 μM	437	IDI1,CYP51A1,PEG10,ACAT2,MSMO1,GSTA2,HMGCR,FDFT1,TNFSF10,EBP,PLIN2,TMEM97,FN1,LDLR,UGT2B7,CYP2E1,FABP1,SHB,INSIG1,SLC51A,LSS,MLLT11,FASN,BCL2L1,EIF4EBP1,TCEAL9,GATA6,APOA1,PANK3,F2,TTR,SAT1,SLC1A2,UGDH,CYP4A11,ID1,GGH,SLC22A1,IFITM1,SULT1B1,CCL15,AGXT2,CYP4A22,COL1A1,DDIT3,FMO5,A2M,CYP1A2,RPS2,PEBP1,CYP2B6,ESR1,MPC2,CYP39A1,SCCPDH,ME1,PARP14,HPR,KRT18,ALB,DPYS,CYP2B7P,ARRDC4,ALDOC,IKBKAP,CYP7A1,S…
Homo sapiens	Rowan-Carroll et al. 2021	Day 10, PFDS 20 μM	472	ACAT2,FABP1,FN1,APOA1,PEG10,SLC22A1,GSTA5,ALB,IDI1,TTR,TMEM97,CYP51A1,CCL15,PLIN2,CYP7A1,TNFSF10,SLC51A,HMGCR,HP,FDFT1,IGFBP1,CYBB,INSIG1,ATF5,A2M,GDF15,KRT7,ACOX1,IGSF6,MBNL1,LDLR,F2,GGH,MSMO1,RNASE6,MPC2,GCLM,TRIB3,EIF4EBP1,ASS1,EBP,LSS,SEL1L,IFI30,TXNRD1,FCER1G,EEF2,TLR1,ATP1A1,CD55,SLC13A5,DDIT3,ALDH3A2,MLLT11,HLA-DRB5,SQSTM1,EVI2B,BEX3,B2M,CTSS,HYOU1,SERPINE2,DNAJB9,LCN2,MS4A7,AOAH,SNHG8,ARR…
Homo sapiens	Rowan-Carroll et al. 2021	Day 14, PFDS 20 μM	402	FN1,TTR,GGH,ALB,F2,HP,LYZ,CYP2E1,HMGCS2,HLA-DRA,IGFBP1,C1S,DPYS,A2M,APOA1,PEG10,IDI1,TXNRD1,HLA-DMB,C1R,LSS,CCL15,TNFSF10,SAA1,C1QB,TMEM97,INSIG1,SLC22A1,CYP2A6,ACAT2,GCLM,AOAH,PLIN2,ABCA6,CYBB,LOC100510495,CYP2B7P,GSTA5,CD14,CYP4A11,HPR,IFITM1,ID1,FABP1,EIF4EBP1,HLA-DRB5,SLC51A,CYP2C8,FASN,MSMO1,CYP51A1,KRT18,FMO5,CLEC7A,CTSS,CAT,SNCA,SERPINE1,HSPD1,C3,IFI30,MLLT11,GDF15,SLC10A1,ECH1,COMT,SLC47A…
Homo sapiens	Reardon et al. 2021	Day 1, 5:3Acid 20 μM	16	IGHG2,TH,DEFA6,ANKRD36BP2,GJD4,GLI2,IGKV4-1,PEG3,SLC6A19,IGKV3D,LOC100505501,PRAC1,GRIN2A,NSG1,RETN,SPANXA2
Homo sapiens	Reardon et al. 2021	Day 1, 6:2FtOH 20 μM	16	FZD10,FGF17,CA1,CT45A6,DEFA6,ANKRD36BP2,BRE-AS1,PEG3,IGKV4-1,IGKV3D,LOC100505501,NSG1,PRAC1,RETN,SPANXA2,TH
Homo sapiens	Reardon et al. 2021	Day 1, 6:2FtS 20 μM	15	AGR3,GRIN2A,IGKV3D,LOC100505501,PRAC1,RETN,SPANXA2,TH,DEFA6,ANKRD36BP2,GLI2,SLC6A19,BRE-AS1,GJD4,IGKV4-1
Homo sapiens	Reardon et al. 2021	Day 1, 6:2monoPAP 20 μM	19	ARR3,HOXA5,SPRR1B,DEFA6,ANKRD36BP2,BRE-AS1,GJD4,GLI2,IGKV4-1,SLC6A19,AGR3,GRIN2A,IGKV3D,LOC100505501,NSG1,PRAC1,RETN,SPANXA2,TH
Homo sapiens	Reardon et al. 2021	Day 1, 8:2FtS 20 μM	17	KRT14,PRAC1,DEFA6,ANKRD36BP2,BRE-AS1,GLI2,IGKV4-1,SLC6A19,GJD4,AGR3,GRIN2A,NSG1,RETN,SPANXA2,TH,IGKV3D,LOC100505501
Homo sapiens	Reardon et al. 2021	Day 1, 8:2monoPAP 20 μM	20	HOXA5,ARR3,MUC2,ELANE,DEFA6,GLI2,ANKRD36BP2,BRE-AS1,GJD4,IGKV4-1,SLC6A19,IGKV3D,LOC100505501,NSG1,PRAC1,SPANXA2,AGR3,GRIN2A,RETN,TH
Homo sapiens	Reardon et al. 2021	Day 1, FtOH8:2 20 μM	17	SCGB2A2,FGF17,DEFA6,BRE-AS1,IGKV4-1,SLC6A19,ANKRD36BP2,GLI2,PRAC1,AGR3,GRIN2A,IGKV3D,LOC100505501,NSG1,RETN,SPANXA2,TH
Homo sapiens	Reardon et al. 2021	Day 1, FtS4:2 20 μM	17	DEFB118,AGR3,GRIN2A,IGKV3D,LOC100505501,PRAC1,RETN,SPANXA2,TH,ANKRD36BP2,BRE-AS1,GJD4,IGKV4-1,PEG3,SLC6A19,WNT7B,DEFA6
Homo sapiens	Reardon et al. 2021	Day 1, Mix1 20 μM	17	FGF17,NSG1,IGHG2,AGR3,IGKV3D,LOC100505501,PRAC1,RETN,SPANXA2,TH,ANKRD36BP2,BRE-AS1,GJD4,GLI2,IGKV4-1,DEFA6,HOXA9
Homo sapiens	Reardon et al. 2021	Day 1, Mix6 20 μM	15	DEFA6,BRE-AS1,GJD4,IGKV4-1,PEG3,ANKRD36BP2,SLC6A19,AGR3,GRIN2A,IGKV3D,LOC100505501,PRAC1,RETN,SPANXA2,TH
Homo sapiens	Reardon et al. 2021	Day 1, Mix7 20 μM	17	BRE-AS1,DEFA6,AGR3,GRIN2A,IGKV3D,LOC100505501,NSG1,PRAC1,RETN,SPANXA2,TH,ANKRD36BP2,GJD4,GLI2,IGKV4-1,PEG3,SLC6A19
Homo sapiens	Reardon et al. 2021	Day 1, PFBA 20 μM	21	ARR3,HLA-DQA2,SPRR1B,DEFA6,LINC00621,ANKRD36BP2,BRE-AS1,GJD4,GLI2,IGKV4-1,PEG3,SLC6A19,AGR3,GRIN2A,IGKV3D,LOC100505501,NSG1,PRAC1,RETN,SPANXA2,TH
Homo sapiens	Reardon et al. 2021	Day 1,PFDA 20 μM	18	LOC100505614,SPRR1B,DEFA6,ANKRD36BP2,BRE-AS1,GJD4,GLI2,IGKV4-1,SLC6A19,PRAC1,AGR3,GRIN2A,IGKV3D,LOC100505501,NSG1,RETN,SPANXA2,TH
Homo sapiens	Reardon et al. 2021	Day 1, PFHpA 20 μM	18	HSP90AA2P,FGF8,IL20,AGR3,GRIN2A,BRE-AS1,DEFA6,ANKRD36BP2,GJD4,GLI2,IGKV4-1,PEG3,IGKV3D,LOC100505501,PRAC1,RETN,SPANXA2,TH
Homo sapiens	Reardon et al. 2021	Day 1, PFHpS 20 μM	16	DEFA6,ANKRD36BP2,BRE-AS1,GJD4,GLI2,IGKV4-1,PEG3,SLC6A19,AGR3,GRIN2A,IGKV3D,LOC100505501,NSG1,RETN,SPANXA2,TH
Homo sapiens	Reardon et al. 2021	Day 1, PFHxA 20 μM	15	NGB,ANKRD36BP2,BRE-AS1,GJD4,GLI2,IGKV4-1,SLC6A19,IGKV3D,LOC100505501,PRAC1,RETN,SPANXA2,TH,AGR3,GRIN2A
Homo sapiens	Reardon et al. 2021	Day 1, PFHxS 20 μM	13	HOXA5,DEFA6,ANKRD36BP2,GLI2,GJD4,IGKV4-1,GRIN2A,IGKV3D,LOC100505501,PRAC1,RETN,SPANXA2,TH
Homo sapiens	Reardon et al. 2021	Day 1, PFNA 20 μM	17	HOXA5,IGL,AGR3,DEFA6,ANKRD36BP2,BRE-AS1,GJD4,IGKV4-1,PEG3,SLC6A19,GRIN2A,PRAC1,IGKV3D,LOC100505501,RETN,SPANXA2,TH
Homo sapiens	Reardon et al. 2021	Day 1, PFOSA 20 μM	20	IGL,GNGT1,CT45A6,FZD10,BRE-AS1,DEFA6,ANKRD36BP2,GLI2,IGKV4-1,PEG3,SLC6A19,AGR3,GRIN2A,IGKV3D,LOC100505501,NSG1,PRAC1,RETN,SPANXA2,TH
Homo sapiens	Reardon et al. 2021	Day 1, PFPeA 20 μM	18	IL20,NGB,FGF17,KRT14,WNT7B,DEFA6,AGR3,GRIN2A,LOC100505501,PRAC1,RETN,SPANXA2,TH,ANKRD36BP2,SLC6A19,BRE-AS1,GJD4,IGKV4-1
Homo sapiens	Reardon et al. 2021	Day 10, 5:3Acid 20 μM	23	SLC22A2,FOXM1,HBQ1,IGL,LMOD1,LOC100505501,SIRPG,TERT,IGHG3,S100A12,VSX1,BRE-AS1,DEFA6,ELANE,ICAM3,NTRK1,PLN,RNASE3,CYP11B1,DEFA4,GLI2,IGKV1,IL11
Homo sapiens	Reardon et al. 2021	Day 10, 6:2FtOH 20 μM	25	SLC22A2,AMHR2,FOXM1,HBQ1,IGL,LOC100505501,SIRPG,SLC6A19,TERT,BRE-AS1,DEFA6,ELANE,ICAM3,IGHG3,NTRK1,PLN,RNASE3,S100A12,VSX1,CYP11B1,DEFA4,DES,GLI2,IGKV1,IL11
Homo sapiens	Reardon et al. 2021	Day 10, 6:2FtS 20 μM	22	IGHG3,FOXM1,HBQ1,IGL,LMOD1,LOC100505501,SLC6A19,BRE-AS1,DEFA6,ELANE,ICAM3,NTRK1,PLN,RNASE3,S100A12,VSX1,CYP11B1,DEFA4,DES,GLI2,IGKV1,IL11
Homo sapiens	Reardon et al. 2021	Day 10, 6:2monoPAP 20 μM	21	FOXM1,HBQ1,IGL,LMOD1,LOC100505501,SLC6A19,TERT,BRE-AS1,DEFA6,ELANE,ICAM3,IGHG3,PLN,S100A12,VSX1,CYP11B1,DEFA4,DES,IGKV1,GLI2,IL11
Homo sapiens	Reardon et al. 2021	Day 10, 8:2FtS 20 μM	24	HBQ1,LMOD1,LOC100505501,FOXM1,IGL,SIRPG,SLC6A19,TERT,BRE-AS1,DEFA6,IGHG3,PLN,RNASE3,S100A12,VSX1,ELANE,ICAM3,NTRK1,GLI2,CYP11B1,DEFA4,DES,IGKV1,IL11
Homo sapiens	Reardon et al. 2021	Day 10, 8:2monoPAP 20 μM	24	GRIN1,HBQ1,IGL,FOXM1,LMOD1,SIRPG,SLC6A19,TERT,PLN,DEFA6,ELANE,IGHG3,NTRK1,RNASE3,BRE-AS1,ICAM3,S100A12,VSX1,GLI2,IL11,CYP11B1,DEFA4,DES,IGKV1
Homo sapiens	Reardon et al. 2021	Day 10, FtOH8:2 20 μM	23	SLC22A2,AMH,FOXM1,HBQ1,IGL,LMOD1,LOC100505501,SLC6A19,TERT,GRIN1,BRE-AS1,DEFA6,ICAM3,IGHG3,NTRK1,PLN,S100A12,VSX1,IGKV1,CYP11B1,DEFA4,DES,GLI2
Homo sapiens	Reardon et al. 2021	Day 10, FtS4:2 20 μM	24	FOXM1,HBQ1,IGL,LMOD1,LOC100505501,SIRPG,SLC6A19,TERT,BRE-AS1,ICAM3,NTRK1,S100A12,VSX1,DEFA6,ELANE,IGHG3,PLN,RNASE3,CYP11B1,DEFA4,DES,IGKV1,GLI2,IL11
Homo sapiens	Reardon et al. 2021	Day 10, Mix1-20	24	MYL1,GRIN1,HBG2,FOXM1,HBQ1,IGL,LMOD1,SIRPG,SLC6A19,TERT,BRE-AS1,ICAM3,IGHG3,NTRK1,PLN,RNASE3,S100A12,VSX1,ELANE,CYP11B1,DEFA4,GLI2,IGKV1,IL11
Homo sapiens	Reardon et al. 2021	Day 10, Mix7-20	21	IGKV3D,CYP11B1,GLI2,IGKV1,IL11,BRE-AS1,DEFA6,ELANE,ICAM3,IGHG3,NTRK1,PLN,RNASE3,S100A12,FOXM1,HBQ1,IGL,LOC100505501,SIRPG,SLC6A19,TERT
Homo sapiens	Reardon et al. 2021	Day 10, PFBA 20 μM	22	PSAPL1,GRIN2A,GLI2,SIRPG,SLC6A19,FOXM1,HBQ1,IGL,LMOD1,TERT,BRE-AS1,ELANE,ICAM3,IGHG3,NTRK1,PLN,RNASE3,VSX1,DEFA4,DES,IGKV1,IL11
Homo sapiens	Reardon et al. 2021	Day 10, PFHpA 20 μM	20	NGB,BRE-AS1,IGL,HBQ1,LMOD1,LOC100505501,SIRPG,SLC6A19,DEFA6,ICAM3,IGHG3,NTRK1,PLN,RNASE3,DEFA4,DES,GLI2,IL11,CYP11B1,IGKV1
Homo sapiens	Reardon et al. 2021	Day 10, PFHpS 20 μM	21	IGKV1,CYP11B1,DEFA4,DES,GLI2,IL11,SIRPG,SLC6A19,FOXM1,HBQ1,IGL,LMOD1,LOC100505501,TERT,DEFA6,ELANE,ICAM3,NTRK1,PLN,RNASE3,BRE-AS1
Homo sapiens	Reardon et al. 2021	Day 10, PFHxA 20 μM	18	CYP11B1,FOXM1,HBQ1,IGL,LOC100505501,SIRPG,SLC6A19,TERT,BRE-AS1,DEFA6,ELANE,ICAM3,IGHG3,PLN,RNASE3,DEFA4,DES,GLI2
Homo sapiens	Reardon et al. 2021	Day 10, PFHxS 20 μM	21	SLC22A2,FOXM1,HBQ1,IGL,LMOD1,LOC100505501,SIRPG,SLC6A19,TERT,BRE-AS1,ELANE,IGHG3,PLN,RNASE3,S100A12,VSX1,DEFA4,DES,GLI2,IGKV1,NTRK1
Homo sapiens	Reardon et al. 2021	Day 10, PFOSA 20 μM	23	INSL3,HBQ1,IGL,LMOD1,LOC100505501,SLC6A19,TERT,BRE-AS1,ELANE,ICAM3,IGHG3,NTRK1,S100A12,VSX1,DEFA6,PLN,RNASE3,DEFA4,DES,GLI2,IL11,CYP11B1,IGKV1
Homo sapiens	Reardon et al. 2021	Day 10, PFPeA 20 μM	22	FOXM1,HBQ1,IGL,LMOD1,LOC100505501,TERT,BRE-AS1,DEFA6,ELANE,ICAM3,IGHG3,NTRK1,PLN,RNASE3,S100A12,VSX1,CYP11B1,DEFA4,DES,GLI2,IGKV1,IL11
Caenorhabditis elegans	Feng et al. 2022	HFPO-DA 1.25x10-5 g/L	458	ceh-79,fbxa-74,col-61,ugt-44,nhx-3,pgp-6,K07C11.8,clc-1,pup-3,nhr-14,hsp-12.1,K08D8.6,W10C8.6,plr-1,twk-5,faah-2,F14F9.4,T24C4.4,cbp-3,spp-15,D1054.18,nhr-58,F48A9.2,C44H4.4,hpo-6,C15A11.7,cest-5.2,frm-4,C08F11.13,acl-4,M7.8,W06G6.10,aex-1,F22F7.8,ttm-5,F52C6.4,kreg-1,F13A7.11,pstk-1,C30G7.2,K10D11.5,gst-34,T19C4.5,nhr-101,ptps-1,T05E12.3,rab-30,nspc-7,Y22D7AL.11,ZC196.5,sqst-1,unc-11,F38B7.3,ttr…
Caenorhabditis elegans	Feng et al. 2022	HFPO-DA 6.25x10-5 g/L	365	flh-2,kgb-1,Y105C5A.1,T05A12.4,unk-1,rig-6,T04C12.8,chil-22,F22F7.8,F21C10.18,F19F10.3,F41E6.5,sox-4,ech-9,Y41G9A.10,H04D03.6,inx-1,eipr-1,dod-3,nlp-51,endu-1,C06A8.8,mig-15,F52E4.5,H05C05.4,clec-178,Y53C12B.7,sprr-2,scav-6,Y69A2AR.31,ZK616.5,C14A11.9,C30G7.2,dnc-4,nhr-86,slc-36.5,tth-1,Y53F4B.21,snf-1,F48F7.5,C46E10.8,unc-78,H12D21.10,ttm-5,aat-2,rga-5,hasp-1,shl-1,C17H12.11,ugt-29,tsr-1,F13G3.1…
Caenorhabditis elegans	Feng et al. 2022	HFPO-DA 3.13x10-4 g/L	439	nhr-58,F21C10.18,K10C2.14,C07A9.13,Y59H11AR.4,lin-33,F27B10.1,shw-1,H04D03.6,eat-20,nspc-7,R119.2,F56F4.4,prx-3,col-153,EGAP1.5,lagr-1,T05A12.4,best-5,sqv-8,oct-1,fig-1,let-383,B0416.11,F21C3.6,tbc-10,T05E12.3,flh-2,ZK1290.13,rnh-1.0,F45E1.4,thn-1,B0272.4,F22F7.8,ceh-74,F35B12.3,nekl-2,cest-4,Y105C5B.19,rab-30,T19D12.5,Y105C5A.1,pkc-3,acr-18,ZC21.8,F40E3.5,ubc-8,spe-8,chhy-1,nhr-109,Y39A1A.22,ZK6…
Caenorhabditis elegans	Feng et al. 2022	HFPO-DA 1.56x10-3 g/L	520	nhx-3,F21C10.18,K09C6.7,T05G5.4,nhr-109,T12A7.6,B0272.4,btb-4,W06G6.17,ceh-21,C25F9.4,F59G1.4,ZK813.4,rab-30,nhr-13,C06E1.11,inx-1,C38C3.10,puf-9,F42G8.8,tag-344,add-2,C36C5.5,fmi-1,sorf-2,snx-17,EGAP9.3,F22F7.8,F17B5.1,gei-1,F27B10.1,aat-4,C09F5.1,T19D12.5,ncs-3,flh-2,F36A2.14,Y69A2AR.47,C08B6.10,ZK354.6,pigs-1,sox-4,kgb-1,pigg-1,nspc-7,ZK863.8,C34D4.2,plpp-1.3,F41B4.2,elo-3,W02H3.1,W03G1.2,src-…
Caenorhabditis elegans	Feng et al. 2022	HFPO-DA 7.81x10-3 g/L	437	thn-1,F22F7.8,pgp-6,W06G6.17,Y43F8B.9,D1054.5,Y47G6A.21,F25E2.3,prx-2,Y41G9A.10,prx-11,trpl-2,nhx-3,F34D10.3,sqv-6,ntc-1,elt-3,fbxa-74,R74.2,dkf-1,C50F2.4,B0457.6,C28A5.1,col-153,F10D11.6,F09F9.1,F21C3.6,Y48A6B.9,kgb-1,swt-6,F56F4.4,Y55F3AM.5,T09B9.1,Y66D12A.13,sox-4,Y39A1A.22,W10C8.6,F52D10.2,F57H12.6,K11H12.4,F21C10.18,Y51A2D.13,frm-7,puf-9,Y54G11A.19,tes-1,frm-4,mes-1,F27B10.1,tra-4,C41G7.8,ra…
Caenorhabditis elegans	Feng et al. 2022	HFPO-DA 1.56x10-2 g/L	304	Y43F8C.3,C30G7.2,F09B9.5,pals-16,kgb-1,nhx-3,aex-1,Y54G11A.19,puf-9,swt-6,F52C6.3,trpl-2,C36A4.10,anmt-1,drd-1,F22F7.8,tiam-1,ugt-29,eat-20,W10C8.6,sox-4,ceh-79,glb-20,F14F9.4,acl-4,tmc-2,K08D9.4,nhr-58,C05D12.2,ntc-1,C34D1.4,D1022.3,F56D2.5,dpy-19,R05G6.10,T27D12.6,F41C3.8,K07D4.9,C41G11.1,pgp-6,T28D6.7,taf-11.1,snf-6,efsc-1,cls-3,D1054.5,C49C3.8,Y22D7AL.11,C07B5.4,hlh-1,dpy-5,mes-1,F09F9.1,ZK18…
Caenorhabditis elegans	Feng et al. 2022	HFPO-DA 3.13x10-2 g/L	292	F22F7.8,F21C10.18,ZK899.1,R05G6.10,ZK218.5,clec-57,fbxa-14,maa-1,F53F8.4,sox-4,dgat-2,F25E2.3,Y51F10.11,msrp-7,C49C3.20,ppt-1,K09C6.7,sorf-2,cls-3,ceh-83,acl-4,B0416.11,nlp-51,K07D4.9,Y37A1A.4,snf-1,slcf-1,R102.8,jip-1,C04C11.1,pigk-1,skr-5,kgb-1,Y71F9AL.2,lin-42,efsc-1,dhhc-12,eri-7,ceh-79,lin-25,C08E8.10,ZK218.7,kel-1,Y105E8B.9,W06G6.17,C09F5.1,elp-1,F20B6.9,Y105C5A.15,Y38C1AA.12,K10C2.12,rgs-4…
Caenorhabditis elegans	Feng et al. 2022	HFPO-DA 6.25x10-2 g/L	437	fbxa-74,taf-11.1,best-5,pgp-6,K11H12.4,sox-4,F09F9.1,F44A2.3,txt-5,drd-1,K10C2.14,F15B9.10,tps-2,elp-1,egl-26,puf-9,flp-20,oac-6,D1086.5,Y65B4A.2,F09B9.5,F22F7.8,C14A11.9,F43H9.3,sym-1,C06A8.8,lagr-1,C30G7.2,ZK512.11,acs-2,plpp-1.3,Y69A2AR.31,zip-1,dgat-2,K10H10.12,dog-1,tag-343,agr-1,egl-3,W02A2.9,tag-229,nsy-4,best-15,F21C10.18,aex-1,dsb-3,F26D2.10,F48A9.2,col-48,ceh-60,T05A12.4,math-22,T24C4.4…
Caenorhabditis elegans	Feng et al. 2022	HFPO-DA 0.125 g/L	449	F21C10.18,nlp-51,thn-1,sprr-2,C30G7.2,T04C12.8,C27A7.1,C49C3.20,F57H12.6,B0416.11,nhr-20,nhx-3,str-7,H04D03.6,pis-1,W10C8.6,ZK512.11,C41G11.1,set-26,prx-11,F43E2.6,pks-1,F15B9.10,spat-3,erl-1,taf-11.1,sox-4,B0432.14,H05C05.4,puf-9,T12A7.6,T23B5.3,T05A12.4,avr-14,ntc-1,mtm-5,B0207.2,frm-7,Y106G6D.6,ZK673.6,C07A9.13,F38A6.5,ugt-51,C50F2.4,F45G2.9,rga-5,pes-23,ets-4,Y46G5A.34,F56F4.4,icap-1,D1022.3,…
Caenorhabditis elegans	Feng et al. 2022	HFPO-DA 0.25 g/L	406	cyp-13A7,prx-2,best-5,sprr-2,pgp-6,glr-6,hlh-1,K06B4.15,nhr-110,Y57G7A.2,H05C05.4,F14F9.4,F21C3.6,eat-20,W06G6.17,ceh-79,F10E7.9,F25G6.1,ttr-21,F58G6.3,ttr-28,F52D10.2,F09B9.5,scav-6,cyp-13A6,Y75B7B.1,fbxa-26,sdf-9,luc-7L3,C30G7.2,bath-36,F36A2.14,F22E12.1,ugt-1,F35C11.2,K12D9.1,tag-344,btb-4,K10C2.12,hsp-12.1,his-67,C42D8.1,exc-13,C48E7.7,clec-26,B0238.12,B0041.11,plr-1,C06C6.8,sox-4,kcc-3,hda-5…
Caenorhabditis elegans	Feng et al. 2022	HFPO-DA 0.5 g/L	615	cyp-13A7,cyp-13A6,F21C10.18,K05C4.4,fbxa-74,Y57G7A.2,pgp-6,F22F7.8,ZK742.3,R13D11.4,nhx-3,swt-6,clec-52,C25A8.2,T16G1.6,Y105C5A.1,rgl-1,nhr-204,rcs-1,sprr-2,eat-20,cyp-34A9,aak-2,C41G11.1,cyp-13A5,adr-1,C17E4.1,gst-34,cln-3.2,puf-9,C07A9.9,C50E10.2,aman-3,Y43F8C.3,C27A7.1,tebp-1,npp-3,aex-1,H20E11.3,H34I24.1,Y42H9AR.2,C30G7.2,prmt-6,F25H5.10,irld-1,K07D4.9,best-5,rgs-6,jmjd-1.2,ugt-62,tlp-1,ZK673…
Caenorhabditis elegans	Feng et al. 2022	HFPO-DA 1 g/L	361	cyp-13A7,cyp-13A6,cyp-13A4,ZK742.3,cyp-13A5,ugt-62,lbp-8,T16G1.6,F25G6.1,clec-52,pgp-5,ugt-63,cdr-1,ugt-19,cyp-33C2,apy-1,Y51H4A.5,best-5,pgp-1,C35B1.8,sprr-2,irg-3,F39F10.3,F21C3.6,ugt-61,F21C10.18,dod-23,R08F11.4,C36C5.5,T05G5.4,F31F6.2,islo-1,plpp-1.3,ckb-2,cyp-35C1,cyp-34A9,C39D10.11,oac-6,fbxa-79,egl-3,T04F8.2,ZK328.6,F35C11.2,F48F7.5,grdn-1,K07C5.9,kgb-1,ech-9,W10C8.4,F49E2.2,tra-4,sid-3,pl…
Caenorhabditis elegans	Feng et al. 2022	HFPO-DA 2 g/L	725	cyp-13A7,cyp-13A6,cyp-13A4,ZK742.3,cyp-13A5,lbp-8,ugt-19,ugt-62,cdr-1,apy-1,gst-8,T16G1.6,kreg-1,ugt-63,cyp-33C2,R08F11.4,pgp-1,irg-3,K08D8.4,F14F9.4,gst-29,ugt-61,Y51H4A.5,ugt-1,cyp-34A9,F35C11.2,C17F4.7,F42A10.7,K09D9.1,B0507.3,ugt-44,alh-5,Y54G2A.10,gst-5,T24C4.4,C53B4.3,F23C8.3,cest-4,cyp-14A2,cyp-33E3,Y39G8B.9,F58B4.5,dhs-26,ugt-58,cbs-1,dod-23,acl-4,T16G1.7,Y42G9A.1,C08E3.13,sysm-1,srr-4,ta…
Caenorhabditis elegans	Feng et al. 2022	HFPO-DA 4 g/L	3147	cyp-13A7,cyp-13A6,cyp-13A4,ugt-19,cyp-13A5,gst-8,cdr-1,ZK742.3,apy-1,T16G1.6,pgp-1,C08E3.13,R05D8.9,ugt-62,C53B4.3,K12D9.1,lbp-8,dhs-26,F58B4.5,irg-3,gst-5,pcp-3,ugt-63,ugt-61,F49F1.5,Y71F9B.1,ugt-1,cyp-33E3,math-20,C15F1.1,asp-13,F42A10.7,ugt-20,R08F11.4,cyp-34A9,clec-210,Y51H4A.5,ugt-48,D1086.3,gst-6,vem-1,Y41C4A.32,col-61,T16G1.7,pho-11,pept-1,C29F7.1,slc-17.3,hrg-7,ctsa-1.2,F09F9.1,C50F7.5,co…
Danio rerio	Dasgupta et al. 2020	14hpf, PFOSA 12.5 μM	833	fabp1b.1,akap12b,apoa2,add3b,slc38a5b,sptan1,apoba,znf865,pou5f3,akt1s1,zbtb16a,mt-atp8,pnrc2,tet3,tbx16,marcksl1b,krt97,copb2,ved,znfl2a,vdrb,eppk1,rundc3b,eno1a,h1m,mn1b,zgc:112994,dspa,zgc:103482,si:dkey-85k7.7,vox,sall4,exd2,tbccd1,rbbp4,fabp2,npm2b,CR391986.1,ndrg1a,cers2b,foxi1,fthl27,brd4,map1lc3c,efnb3b,reep3b,efr3ba,cyp24a1,celsr1a,selenop,marcksl1a,pfkfb3,ntn5,nanog,myb,tgfbi,ddx21,si:d…
Danio rerio	Dasgupta et al. 2020	24hpf, PFOSA 12.5 μM	3181	pim2,actc1b,mylz3,ckma,neb,hspb1,krt99,ttn.2,akap12b,col1a2,eppk1,msgn1,tnnt3a,tent5ba,ttn.1,col1a1a,sall4,tnni2a.4,ppp1r15a,fabp3,SRL,acta1b,aldoab,xirp2a,klhl31,cav3,krt18a.1,tnnt3b,alcamb,pdlim7,dspa,mcl1b,desma,mylpfb,zmp:0000000624,plecb,col1a1b,slc38a5b,add3b,mt-co3,egln3,col11a1a,casq2,nexn,krt8,tnc,sox6,ctsll,txlnba,elavl4,si:ch211-266g18.10,si:dkey-92i17.2,myl10,foxp4,stx1b,tnni2b.1,col2…
Gadus morhua	Khan et al. 2021	Mix high concentration	2996	ENSGMOG00000032835,ENSGMOG00000001040,ENSGMOG00000000051,ENSGMOG00000034014,ENSGMOG00000019543,ENSGMOG00000013367,ENSGMOG00000035692,ENSGMOG00000023263,ENSGMOG00000008289,ENSGMOG00000005872,ENSGMOG00000014451,ENSGMOG00000029918,ENSGMOG00000033302,ENSGMOG00000024122,ENSGMOG00000022507,ENSGMOG00000014639,ENSGMOG00000000800,ENSGMOG00000027464,ENSGMOG00000019455,ENSGMOG00000014770,ENSGMOG00000023121,…
Gadus morhua	Khan et al. 2021	Mix medium concentration	327	ENSGMOG00000023121,ENSGMOG00000005117,ENSGMOG00000024265,ENSGMOG00000002886,ENSGMOG00000029217,ENSGMOG00000009201,ENSGMOG00000027744,ENSGMOG00000002384,ENSGMOG00000000126,ENSGMOG00000016721,ENSGMOG00000019543,ENSGMOG00000014100,ENSGMOG00000007075,ENSGMOG00000004034,ENSGMOG00000003829,ENSGMOG00000016802,ENSGMOG00000011560,ENSGMOG00000002585,ENSGMOG00000009829,ENSGMOG00000026660,ENSGMOG00000028576,…
Gadus morhua	Khan et al. 2021	Mix low concentration	1025	ENSGMOG00000013998,ENSGMOG00000027744,ENSGMOG00000033372,ENSGMOG00000001838,ENSGMOG00000035299,ENSGMOG00000033280,ENSGMOG00000005758,ENSGMOG00000006040,ENSGMOG00000003995,ENSGMOG00000000158,ENSGMOG00000034982,ENSGMOG00000018600,ENSGMOG00000000800,ENSGMOG00000011498,ENSGMOG00000019455,ENSGMOG00000007581,ENSGMOG00000035692,ENSGMOG00000029938,ENSGMOG00000027123,ENSGMOG00000032232,ENSGMOG00000014063,…
Gadus morhua	Khan et al. 2021	PFNA high concentration	804	ENSGMOG00000000037,ENSGMOG00000000529,ENSGMOG00000000097,ENSGMOG00000000420,ENSGMOG00000010268,ENSGMOG00000001309,ENSGMOG00000036582,ENSGMOG00000006376,ENSGMOG00000007796,ENSGMOG00000025187,ENSGMOG00000016926,ENSGMOG00000011700,ENSGMOG00000009393,ENSGMOG00000033966,ENSGMOG00000000861,ENSGMOG00000003217,ENSGMOG00000012473,ENSGMOG00000028502,ENSGMOG00000013705,ENSGMOG00000006035,ENSGMOG00000007775,…
Gadus morhua	Khan et al. 2021	PFNA medium concentration	89	ENSGMOG00000011339,ENSGMOG00000000729,ENSGMOG00000029931,ENSGMOG00000005651,ENSGMOG00000028074,ENSGMOG00000035164,ENSGMOG00000022202,ENSGMOG00000015051,ENSGMOG00000007706,ENSGMOG00000018545,ENSGMOG00000012686,ENSGMOG00000035136,ENSGMOG00000026209,ENSGMOG00000001309,ENSGMOG00000004303,ENSGMOG00000026062,ENSGMOG00000029058,ENSGMOG00000028397,ENSGMOG00000032996,ENSGMOG00000000529,ENSGMOG00000003827,…
Gadus morhua	Khan et al. 2021	PFNA low concentration	66	ENSGMOG00000004303,ENSGMOG00000017202,ENSGMOG00000022202,ENSGMOG00000001309,ENSGMOG00000030767,ENSGMOG00000032652,ENSGMOG00000030868,ENSGMOG00000033383,ENSGMOG00000014705,ENSGMOG00000002636,ENSGMOG00000035998,ENSGMOG00000007490,ENSGMOG00000026209,ENSGMOG00000020254,ENSGMOG00000016462,ENSGMOG00000037192,ENSGMOG00000001131,ENSGMOG00000016314,ENSGMOG00000005038,ENSGMOG00000035358,ENSGMOG00000025104,…
Gadus morhua	Khan et al. 2021	PFOA high concentration	1767	ENSGMOG00000006501,ENSGMOG00000000037,ENSGMOG00000031906,ENSGMOG00000003804,ENSGMOG00000010880,ENSGMOG00000013127,ENSGMOG00000013822,ENSGMOG00000034109,ENSGMOG00000027937,ENSGMOG00000001968,ENSGMOG00000000097,ENSGMOG00000010407,ENSGMOG00000035320,ENSGMOG00000009482,ENSGMOG00000034682,ENSGMOG00000008304,ENSGMOG00000033095,ENSGMOG00000026000,ENSGMOG00000029984,ENSGMOG00000000593,ENSGMOG00000002675,…
Gadus morhua	Khan et al. 2021	PFOA medium concentration	103	ENSGMOG00000017091,ENSGMOG00000022436,ENSGMOG00000035293,ENSGMOG00000029402,ENSGMOG00000024122,ENSGMOG00000033346,ENSGMOG00000036483,ENSGMOG00000026334,ENSGMOG00000008860,ENSGMOG00000005155,ENSGMOG00000006949,ENSGMOG00000022731,ENSGMOG00000032615,ENSGMOG00000003460,ENSGMOG00000025053,ENSGMOG00000012491,ENSGMOG00000005113,ENSGMOG00000002751,ENSGMOG00000030717,ENSGMOG00000025228,ENSGMOG00000011668,…
Gadus morhua	Khan et al. 2021	PFOA low concentration	563	ENSGMOG00000028433,ENSGMOG00000035965,ENSGMOG00000016412,ENSGMOG00000007554,ENSGMOG00000020127,ENSGMOG00000026390,ENSGMOG00000019009,ENSGMOG00000019809,ENSGMOG00000012747,ENSGMOG00000015635,ENSGMOG00000010720,ENSGMOG00000027123,ENSGMOG00000013806,ENSGMOG00000019554,ENSGMOG00000033478,ENSGMOG00000012571,ENSGMOG00000004126,ENSGMOG00000001968,ENSGMOG00000006699,ENSGMOG00000012997,ENSGMOG00000024157,…
Gadus morhua	Khan et al. 2021	PFOS high concentration	5305	ENSGMOG00000031015,ENSGMOG00000033010,ENSGMOG00000015145,ENSGMOG00000014854,ENSGMOG00000004303,ENSGMOG00000016860,ENSGMOG00000032468,ENSGMOG00000009109,ENSGMOG00000019446,ENSGMOG00000005531,ENSGMOG00000031185,ENSGMOG00000001890,ENSGMOG00000031664,ENSGMOG00000024416,ENSGMOG00000036095,ENSGMOG00000032131,ENSGMOG00000019853,ENSGMOG00000033558,ENSGMOG00000008239,ENSGMOG00000019877,ENSGMOG00000029859,…
Gadus morhua	Khan et al. 2021	PFOS medium concentration	248	ENSGMOG00000010859,ENSGMOG00000029404,ENSGMOG00000008984,ENSGMOG00000014279,ENSGMOG00000037077,ENSGMOG00000031015,ENSGMOG00000023260,ENSGMOG00000002588,ENSGMOG00000031185,ENSGMOG00000023341,ENSGMOG00000036424,ENSGMOG00000028766,ENSGMOG00000017693,ENSGMOG00000030399,ENSGMOG00000035303,ENSGMOG00000005722,ENSGMOG00000035091,ENSGMOG00000032468,ENSGMOG00000007475,ENSGMOG00000014970,ENSGMOG00000020245,…
Gadus morhua	Khan et al. 2021	PFOS low concentration	2862	ENSGMOG00000030504,ENSGMOG00000020384,ENSGMOG00000000563,ENSGMOG00000031185,ENSGMOG00000008540,ENSGMOG00000034213,ENSGMOG00000016339,ENSGMOG00000029404,ENSGMOG00000015409,ENSGMOG00000003867,ENSGMOG00000020245,ENSGMOG00000000820,ENSGMOG00000025187,ENSGMOG00000011938,ENSGMOG00000006751,ENSGMOG00000007063,ENSGMOG00000031304,ENSGMOG00000037003,ENSGMOG00000003783,ENSGMOG00000005615,ENSGMOG00000014639,…
Micropterus salmoides	Collí-Dulá et al. 2016	Testis, Lake Calhoun	3930	UF_Msa_AF_108403,UF_Msa_AF_107255,UF_Msa_CF_127356,UF_Msa_CF_122209,UF_Msa_AF_107448,UF_Msa_AF_102527,UF_Msa_CF_121047,UF_Msa_AF_102616,UF_Msa_CF_124555,UF_Msa_AF_109759,UF_Msa_CF_121399,UF_Msa_CF_121972,UF_Msa_CF_123415,UF_Msa_AF_106932,UF_Msa_AF_101139,UF_Msa_AF_105610,UF_Msa_AF_104102,UF_Msa_AF_109855,UF_Msa_CF_120585,UF_Msa_AF_107335,UF_Msa_AD_200266,UF_Msa_AF_109209,UF_Msa_AF_106540,UF_Msa_A…
Micropterus salmoides	Collí-Dulá et al. 2016	Testis, Lake Medicine	6378	UF_Msa_CF_126154,UF_Msa_AF_107255,UF_Msa_CF_121407,UF_Msa_AF_107438,UF_Msa_CF_118649,UF_Msa_AF_110063,UF_Msa_AF_101848,UF_Msa_AF_102616,UF_Msa_CF_119388,UF_Msa_CF_122398,UF_Msa_CF_124634,UF_Msa_AF_105432,UF_Msa_AF_104962,UF_Msa_CF_127640,UF_Msa_AF_101406,UF_Msa_AF_102073,UF_Msa_AF_108403,UF_Msa_AF_109015,UF_Msa_AF_101055,UF_Msa_AF_101755,UF_Msa_CF_119386,UF_Msa_CF_124968,UF_Msa_CF_120547,UF_Msa_A…
Micropterus salmoides	Collí-Dulá et al. 2016	Testis, Lake Prior	7361	UF_Msa_CF_126154,UF_Msa_CF_118649,UF_Msa_AF_101641,UF_Msa_CF_119388,UF_Msa_AF_102654,UF_Msa_AF_110063,UF_Msa_AF_101848,UF_Msa_CF_125008,UF_Msa_AF_108403,UF_Msa_AF_103468,UF_Msa_AF_102616,UF_Msa_AF_105432,UF_Msa_AF_104274,UF_Msa_CF_125643,UF_Msa_CF_127356,UF_Msa_AF_108480,UF_Msa_CF_120603,UF_Msa_AF_102073,UF_Msa_AF_109015,UF_Msa_AF_102646,UF_Msa_CF_121972,UF_Msa_AF_105371,UF_Msa_CF_127303,UF_Msa_C…
Micropterus salmoides	Collí-Dulá et al. 2016	Testis, Lake Twin	5787	UF_Msa_CF_121690,UF_Msa_AF_103715,UF_Msa_AF_107577,UF_Msa_CF_120497,UF_Msa_CF_121409,UF_Msa_CF_124412,UF_Msa_AF_104415,UF_Msa_AF_108941,UF_Msa_AF_108403,UF_Msa_CF_125935,UF_Msa_AF_105096,UF_Msa_AF_104548,UF_Msa_CF_123382,UF_Msa_AF_107560,UF_Msa_AF_106507,UF_Msa_AF_104354,UF_Msa_AF_108424,UF_Msa_CF_119949,UF_Msa_AF_109140,UF_Msa_AF_108475,UF_Msa_AF_106665,UF_Msa_AF_102929,UF_Msa_CF_122460,UF_Msa_A…
Micropterus salmoides	Collí-Dulá et al. 2016	Liver, Lake Calhoun	3039	UF_Msa_CF_122056,UF_Msa_CF_124698,UF_Msa_CF_125198,UF_Msa_AF_104354,UF_Msa_CF_124665,UF_Msa_CF_124474,UF_Msa_AD_200304,UF_Msa_AF_100708,UF_Msa_AD_200321,UF_Msa_AF_108842,UF_Msa_AF_102790,UF_Msa_CF_122722,UF_Msa_CF_122066,UF_Msa_AD_200329,UF_Msa_CF_118535,UF_Msa_CF_127651,UF_Msa_AF_102939,UF_Msa_CF_120460,UF_Msa_AD_200259,UF_Msa_CF_119506,UF_Msa_CF_124621,UF_Msa_AF_108905,UF_Msa_AF_105089,UF_Msa_A…
Micropterus salmoides	Collí-Dulá et al. 2016	Liver, Lake Medicine	5301	UF_Msa_CF_122810,UF_Msa_AF_107348,UF_Msa_AF_104328,UF_Msa_AF_103371,UF_Msa_CF_120707,UF_Msa_AF_103062,UF_Msa_CF_127268,UF_Msa_AF_104991,UF_Msa_AF_107168,UF_Msa_AF_100214,UF_Msa_AF_103229,UF_Msa_CF_125427,UF_Msa_AF_103265,UF_Msa_CF_122407,UF_Msa_AF_100689,UF_Msa_AF_106356,UF_Msa_AF_103425,UF_Msa_CF_125464,UF_Msa_AF_108946,UF_Msa_CF_124212,UF_Msa_AF_100244,UF_Msa_AF_105347,UF_Msa_CF_127075,UF_Msa_C…
Micropterus salmoides	Collí-Dulá et al. 2016	Liver, Lake Prior	5047	UF_Msa_CF_122810,UF_Msa_AF_104328,UF_Msa_AF_103371,UF_Msa_AF_107348,UF_Msa_CF_120707,UF_Msa_CF_127268,UF_Msa_AF_103062,UF_Msa_AF_104991,UF_Msa_AF_103229,UF_Msa_AF_100214,UF_Msa_AF_107168,UF_Msa_AF_103265,UF_Msa_CF_125427,UF_Msa_AF_103425,UF_Msa_AF_100689,UF_Msa_CF_127075,UF_Msa_CF_122407,UF_Msa_AF_108946,UF_Msa_CF_119153,UF_Msa_AF_106356,UF_Msa_AF_100244,UF_Msa_CF_124212,UF_Msa_CF_125464,UF_Msa_A…
Micropterus salmoides	Collí-Dulá et al. 2016	Liver, Lake Twin	1646	UF_Msa_AF_104452,UF_Msa_CF_120515,UF_Msa_CF_124880,UF_Msa_AF_103286,UF_Msa_CF_122817,UF_Msa_CF_123661,UF_Msa_AF_105106,UF_Msa_CF_120620,UF_Msa_AF_104428,UF_Msa_AF_106589,UF_Msa_AF_109801,UF_Msa_AF_100703,UF_Msa_AF_105730,UF_Msa_AF_107667,UF_Msa_AF_106778,UF_Msa_AF_108721,UF_Msa_AF_106348,UF_Msa_AF_100753,UF_Msa_CF_120650,UF_Msa_AF_109160,UF_Msa_AF_103255,UF_Msa_CF_121058,UF_Msa_AF_109946,UF_Msa_A…
Pimephales promelas	Rodríguez-Jorquera et al. 2019	Liver, PFOS 0.5 µg/L	1374	UF_Ppr_AF_103144,UF_Ppr_AF_103929,UF_Ppr_AF_113106,UF_Ppr_AF_118841,UF_Ppr_AF_116689,UF_Ppr_AF_114542,UF_Ppr_AF_101133,UF_Ppr_AF_117808,UF_Ppr_AF_112725,UF_Ppr_AF_103256,UF_Ppr_AF_106602,UF_Ppr_AF_117460,UF_Ppr_AF_118924,UF_Ppr_AF_105283,UF_Ppr_AF_115155,UF_Ppr_AF_100022,UF_Ppr_AF_112085,UF_Ppr_AF_104660,UF_Ppr_AF_101130,UF_Ppr_AF_117515,UF_Ppr_AF_115804,UF_Ppr_AF_101955,UF_Ppr_AF_117954,UF_Ppr_A…
Pimephales promelas	Rodríguez-Jorquera et al. 2019	Liver, PFOS 25 µg/L	1113	UF_Ppr_AF_112779,UF_Ppr_AF_114009,UF_Ppr_AF_116285,UF_Ppr_AF_105283,UF_Ppr_AF_115108,UF_Ppr_AF_113106,UF_Ppr_AF_115280,UF_Ppr_AF_113676,UF_Ppr_AF_114473,UF_Ppr_AF_114500,UF_Ppr_AF_103463,UF_Ppr_AF_102565,UF_Ppr_AF_111936,UF_Ppr_AF_118882,UF_Ppr_AF_111230,UF_Ppr_AF_103392,UF_Ppr_AF_116745,UF_Ppr_AF_101446,UF_Ppr_AF_112773,UF_Ppr_AF_104460,UF_Ppr_AF_103929,UF_Ppr_AF_100806,UF_Ppr_AF_100554,UF_Ppr_A…
Pimephales promelas	Rodríguez-Jorquera et al. 2019	Liver, Mix	811	UF_Ppr_AM_120524,UF_Ppr_AF_107626,UF_Ppr_AF_103929,UF_Ppr_AF_111982,UF_Ppr_AF_112754,UF_Ppr_AF_115010,UF_Ppr_AF_104817,UF_Ppr_AF_110175,UF_Ppr_AF_116998,UF_Ppr_AF_111265,UF_Ppr_AF_109691,UF_Ppr_AF_102285,UF_Ppr_AF_114692,UF_Ppr_AM_119853,UF_Ppr_AF_114496,UF_Ppr_AF_111553,UF_Ppr_AF_106286,UF_Ppr_AF_109066,UF_Ppr_AF_111653,UF_Ppr_AF_107908,UF_Ppr_AF_115804,UF_Ppr_AF_112774,UF_Ppr_AF_103633,UF_Ppr_A…
Pimephales promelas	Rodríguez-Jorquera et al. 2019	Blood, PFOS 0.5 µg/L	2356	UF_Ppr_AF_111176,UF_Ppr_AM_119454,UF_Ppr_AF_112074,UF_Ppr_AF_115351,UF_Ppr_AF_110232,UF_Ppr_AF_111441,UF_Ppr_AF_112391,UF_Ppr_AF_114419,UF_Ppr_AF_109441,UF_Ppr_AF_100441,UF_Ppr_AF_115195,UF_Ppr_AF_113128,UF_Ppr_AF_115804,UF_Ppr_AF_109174,UF_Ppr_AF_112268,UF_Ppr_AF_108774,UF_Ppr_AF_105399,UF_Ppr_AF_118710,UF_Ppr_AF_111891,UF_Ppr_AM_120462,UF_Ppr_AF_104513,UF_Ppr_AF_103587,UF_Ppr_AF_107401,UF_Ppr_A…
Pimephales promelas	Rodríguez-Jorquera et al. 2019	Blood, PFOS 25 µg/L	701	UF_Ppr_AF_110419,UF_Ppr_AF_112895,UF_Ppr_AF_117125,UF_Ppr_AF_102486,UF_Ppr_AF_108509,UF_Ppr_AF_105913,UF_Ppr_AF_116644,UF_Ppr_AF_100427,UF_Ppr_AF_118232,UF_Ppr_AF_110256,UF_Ppr_AF_100809,UF_Ppr_AF_114542,UF_Ppr_AF_112303,UF_Ppr_AF_102596,UF_Ppr_AF_118032,UF_Ppr_AF_114375,UF_Ppr_AF_109688,UF_Ppr_AF_111591,UF_Ppr_AF_104986,UF_Ppr_AF_110277,UF_Ppr_AF_108632,UF_Ppr_AF_108524,UF_Ppr_AF_111104,UF_Ppr_A…
Pimephales promelas	Rodríguez-Jorquera et al. 2019	Blood, Mix	722	UF_Ppr_AF_110419,UF_Ppr_AF_102486,UF_Ppr_AF_110256,UF_Ppr_AF_116644,UF_Ppr_AF_100809,UF_Ppr_AF_112895,UF_Ppr_AF_117125,UF_Ppr_AF_113891,UF_Ppr_AF_118032,UF_Ppr_AF_100427,UF_Ppr_AF_111043,UF_Ppr_AF_105913,UF_Ppr_AF_104986,UF_Ppr_AF_111591,UF_Ppr_AF_117180,UF_Ppr_AF_107906,UF_Ppr_AF_111999,UF_Ppr_AF_108632,UF_Ppr_AF_111104,UF_Ppr_AF_116393,UF_Ppr_AF_102596,UF_Ppr_AF_110277,UF_Ppr_AF_113419,UF_Ppr_A…
