# Supplementary material for: Cross-species Transcriptomics Analysis Highlights Conserved Molecular Responses to Per- and Polyfluoroalkyl Substances (PFAS)
Source: Preprints.org preprint supplement (doi:10.20944/preprints202306.0413.v3), 2023-06-28
Supplement: Supplementary file 5 [file SupplementaryFileS4.xlsx]

## Sheet: Metabolites scores - human
Metabolites	PFBS_d1_RC	PFBS_d4_RC	PFBS_d10_RC	PFBS_d14_RC	PFDS_d1_RC	PFDS_d4_RC	PFDS_d10_RC	PFDS_d14_RC	PFOA_d1_RC	PFOA_d4_RC	PFOA_d10_RC	PFOA_d14_RC	PFOS_d1_RC	PFOS_d4_RC	PFOS_d10_RC	PFOS_d14_RC	5:3 Acid_d1_RE	5:3 Acid_d10_RE	6:2 FtS_d1_RE	6:2 FtS_d10_RE	6:2 monoPAP_d1_RE	6:2 monoPAP_d10_RE	8:2 FtS_d1_RE	8:2 FtS_d10_RE	8:2 monoPAP_d1_RE	8:2 monoPAP_d10_RE	6:2 FtOH_d1_RE	6:2 FtOH_d10_RE	FtOH 8.2_d1_RE	FtOH 8.2_d10_RE	FtS 4:2_d1_RE	FtS 4:2_d10_RE	Mix1_d1_RE	Mix1_d10_RE	Mix6_d1_RE	Mix7_d1_RE	Mix7_d10_RE	PFBA_d1_RE	PFBA_d10_RE	PFDA_d1_RE	PFHpA_d1_RE	PFHpA_d10_RE	PFHpS_d1_RE	PFHpS_d10_RE	PFHxA_d1_RE	PFHxA_d10_RE	PFHxS_d1_RE	PFHxS_d10_RE	PFNA_d1_RE
1-methylnicotinamide	-0.432991	-0.54417	-1.93015	-1.18667	1.66526	2.09318	-1.18578	-0.482715	-0.857318	-2.05081	-2.11146	-4.75976	-1.12756	-0.554287	-2.14609	-1.64643	-2.86805	0.281361	-1.16967	0.323683	0.935165	1.97678	1.77006	0.385277	1.73013	-0.556182	1.06628	2.98736	1.33317	-0.708867	-2.26707	-1.42972	0.471845	-1.14471	0.809756	0.961741	0.211417	2.39239	-0.29141	-1.12453	-0.281703	-0.217821	-2.68735	-2.02999	2.48749	-0.196951	-1.01662	0.037776	-1.61381
2-aminoadipate	-1.47664	0.639384	0.606346	0.726364	-1.09642	0.939434	-0.454262	-0.667778	0.735538	-0.225528	-1.42702	1.43604	0.879525	-0.202491	-1.15941	-0.577029	1.25213	0.746598	0.958435	-2.78693	-0.633267	-2.87093	0.337263	-2.79322	0.126476	-1.22462	0.109294	-1.48161	-0.538391	-1.30361	-0.156012	-1.27555	-0.255575	-2.43795	-1.99373	-0.56234	-3.49334	-0.565753	-1.25762	-0.789585	0.587868	-0.553016	-0.174549	-1.10402	-0.42182	-4.58468	-0.881497	-0.793261	-0.317355
2-deoxyadenosine	0.308682	-0.335835	0.655656	-0.418332	0.952121	-0.0992057	-2.90222	-0.757814	0.990862	-0.451539	-0.696489	-0.240397	-0.603235	-0.389142	-2.78795	-1.84954	-1.8822	-0.144193	3.78157	-1.1732	-0.063075	-0.0983557	0.622675	-0.55223	-0.944681	1.19474	2.35328	1.74032	-0.76874	0.144859	-2.52934	0.318105	-0.279435	0.0841341	0.0175307	-0.484862	0.0888024	-0.456908	0.804675	-0.65883	-1.46538	0.622874	-0.458469	0.192276	0.469989	-0.295647	-1.46466	-0.131483	-1.52238
2-deoxycytidine	-0.545487	-0.648081	-0.102546	0.00264212	-1.28084	-0.902321	-0.119106	-0.746078	0.42744	0.447213	0.00587776	1.2441	-0.48583	0.919708	1.69835	-0.591703	3.58393	1.07698	-0.016507	0.204955	-1.17217	0.0968419	-0.966574	-1.57262	-0.171788	-0.940931	-1.54528	-1.5025	0.465039	0.47711	-0.129244	0.332263	-0.513777	1.1779	-2.69066	1.36606	1.27725	0.0503819	0.26665	1.1332	0.376725	0.404547	2.02592	2.11944	0.424245	0.259411	-0.0831899	0.927877	-0.270205
2-hydroxyglutarate	-1.99535	-0.0944007	-0.453353	-2.51985	-0.29673	0.402337	1.16873	-0.312516	0.335521	0.0867658	0.762369	0.218706	-0.706966	0.0724432	0.959047	-0.44633	-2.20927	0.548677	0.0277857	0.384149	-0.555995	0.400155	-0.0204382	-0.650328	-1.61799	-0.146318	-1.887	-2.35131	-1.04868	0.205225	-0.97033	0.871803	0.265671	-0.195117	-0.31515	-1.06872	-1.33254	-1.48775	0.416814	-3.01397	-0.749969	0.371981	-0.858372	0.0189045	0.0129924	0.821226	-0.260121	-1.81912	-0.102855
3-methyladipate/pimelate	0.0858159	1.16669	-0.297281	-0.695331	0.514358	0.0889455	-1.77831	2.08257	0.111283	0.327239	-0.224637	-0.902688	-0.00798791	-0.654923	-1.69042	-1.19178	-0.725301	0.166495	0.789231	1.79668	0.799313	0.713554	1.79719	-2.06773	0.477632	0.0922574	-0.132774	0.882991	1.22187	0.0632052	2.05754	-0.278943	-0.585284	1.43829	0.382088	-0.0840524	0.864693	3.41971	-0.407685	-0.187054	1.06847	-0.112808	1.1096	0.346635	1.66205	-0.236779	-1.69701	-1.0452	0.792656
3-phosphoglycerate	-0.513227	-0.912077	-1.52576	-0.108706	0.423335	-1.29334	0.984362	1.01977	-0.125884	-1.07484	-0.713137	-0.0316243	0.255571	-0.0747918	3.91787	1.43435	-0.593161	-1.98344	-1.19732	-0.947783	-1.0953	-0.111206	-1.18578	-0.561187	0.120602	0.801771	-0.203419	0.351338	0.502318	0.336762	-1.68229	-0.590474	-0.569257	1.06269	-0.625794	-1.00105	-0.0189559	0.918075	-1.13677	-0.601152	-0.45887	-0.429617	-0.792817	-0.451272	-1.3668	0.904287	1.4639	-0.0658485	0.766634
5-adenosylhomocysteine	0.581551	-1.54786	-0.435371	-0.876894	0.995933	1.70874	1.57132	2.02457	0.190336	0.508997	0.252797	0.0554661	3.05207	2.07708	4.0738	3.18485	-1.14045	0.103692	0.658554	0.169841	-0.531068	1.10387	-1.48956	0.232667	1.72071	1.24447	0.93843	0.137055	0.754864	0.231974	-1.10618	0.222407	1.8749	1.56394	2.79712	1.6602	-0.37516	0.781915	0.0881776	2.53288	0.0958716	-0.185485	0.723238	0.503409	1.50586	0.242431	0.872264	-0.256057	1.8691
acetylcarnitine	0.65957	0.410251	0.0819292	2.00354	-0.316638	0.714732	1.36354	1.73793	-0.642408	-0.582472	-3.6831	0.619982	-0.686534	0.434738	-1.83217	1.27623	1.11868	0.240281	-0.370176	-0.388148	0.652963	-1.40344	0.34104	-1.49968	1.58668	-0.765336	-0.474227	-0.453632	0.145126	1.61933	-0.0516179	-0.801254	-0.896191	-0.422671	-2.47808	1.49031	0.919339	-0.489272	-2.15253	-1.37859	-0.0186202	1.39381	2.01215	-2.15937	-1.71725	0.347439	1.15757	-0.618607	-0.116533
acetylglycine	2.05132	1.30478	1.31283	0.88876	0.861419	1.96013	-0.138076	2.81116	2.00252	1.79738	2.34213	2.89662	-0.0308932	0.732436	0.643261	4.54332	1.3523	-1.46263	0.737917	0.761429	0.650817	-1.88375	0.430919	-0.487815	0.496493	-1.2424	1.32152	0.789132	0.380287	-2.32861	2.05181	-1.00911	0.156482	0.899246	0.461274	0.131449	-1.2737	1.00708	-0.751018	0.564715	1.0708	-1.87827	0.766349	-2.12888	1.00294	0.843808	0.728588	-2.25866	2.18061
aconitate	0	0	0	0	0	0	0	0	0	0	0	0	0	0	0	0	0	0	0	0	0	0	0	0	0	0	0	0	0	0	0	0	0	0	0	0	0	0	0	0	0	0	0	0	0	0	0	0	0
alanine	0.307363	0.475	-1.41454	-0.154648	0.230837	0.415941	-1.44241	-0.57646	-0.150018	-0.76345	-1.33879	0.795869	-0.833271	-1.28813	-0.651273	0.435626	0.657646	-0.855219	-1.05417	0.777536	-0.93531	-0.104347	-1.62383	1.26438	-0.529133	-3.81444	1.06881	-0.414138	0.33513	-0.341288	0.92709	0.616858	-0.144421	0.148682	-1.51111	-0.729245	1.5306	0.393492	-2.1046	0.812784	0.868769	0.126778	-0.847199	-0.0984261	-0.222624	0.954392	-0.960983	-0.631392	-0.161235
allantoin	-0.563413	0.70056	0.101045	-0.942333	1.09055	3.1196	0.572169	0.324188	-0.394655	1.47761	-0.0224101	0.098539	4.30503	1.77565	0.691541	0.0482943	1.02897	0.0363667	-1.31273	-0.800686	0.96594	2.39826	-0.419562	-0.169584	1.18091	0.0506723	-1.13113	0.0751999	0.76379	0.434971	0.717736	-0.323745	-1.27849	-0.746213	-0.586381	0.43164	1.25956	0.600333	-1.02475	0.836999	0.442962	-1.3159	0.209223	-1.61085	-1.28952	0.0343819	0.773335	-0.927424	-0.00934563
alpha-glycerophosphate	-1.30655	0.775065	0.469319	-1.01611	-1.22224	-1.44335	0.0692975	-0.0235248	0.702105	0.398853	3.66755	2.31061	0.636122	0.299728	3.66157	1.66307	1.79659	-0.523108	-0.0884644	0.238009	0.0920712	1.01031	-2.65565	-1.34276	0.615405	-0.535932	-0.945999	0.0733331	2.00894	-1.08484	1.66309	-0.115778	0.697328	2.58828	1.35783	-1.91595	-0.733021	2.48513	-0.22133	1.37209	2.09371	0.0276148	2.48352	0.953252	-0.788081	-0.224456	2.42715	-0.0869414	3.50565
alpha-hydroxybutyrate	1.13446	-0.450144	0.76753	0.107472	1.23988	-0.403499	-2.09946	-0.61763	-1.20543	1.06784	1.19272	-0.336736	1.04482	0.609922	-1.21284	-0.742668	-0.184227	-0.408851	-0.579424	0.844834	0.0251998	-1.14061	-0.569972	1.20923	1.83904	0.229141	-1.50105	-0.610075	1.00359	0.286062	1.18179	-1.3472	-0.681016	-0.0735388	-0.533667	0.691864	-0.829795	0.291972	0.663705	-0.0344764	-0.0545891	0.110836	1.07051	2.27837	-0.923219	-0.497302	0.851057	2.02098	1.11417
AMP	-1.22844	-0.590007	1.46071	2.00374	-0.214712	-1.05816	-0.759915	-0.252815	0.691945	0.669343	0.5032	1.8754	0.291643	-0.530533	-1.4241	1.39114	1.99898	0.615216	-0.219019	-1.58148	0.904807	-2.95055	0.922466	-2.73482	0.250513	-1.51199	0.0988354	-2.02004	0.0135124	-1.07504	3.15594	-0.753281	0.660965	1.57896	-0.717552	-0.255544	-3.07562	0.591142	-0.949713	2.26519	1.26282	0.708642	1.78226	1.50223	-2.04488	-1.55294	1.67528	-0.966102	2.94606
anserine	1.01901	1.05862	-0.9864	0.711735	0.324871	0.730256	1.37393	0.490314	-1.44199	-0.00260706	0.0577927	0.933814	-2.31458	0.200647	-0.994852	0.087932	0.209727	-0.934082	2.38155	0.363109	0.591042	-1.06911	2.02077	-1.31341	-1.80257	-0.191254	0.170175	-1.67722	0.307009	-0.444347	-0.161282	0.417278	-0.590692	-0.182436	-1.08294	-1.07316	-1.53513	-0.479179	1.01438	-0.541978	0.191416	-0.341441	-0.424605	-0.478469	0.708735	-1.21144	-1.59268	-0.253014	-2.85548
anthranilic acid	-0.808944	-2.62403	-2.47165	-1.80168	-0.349228	-0.338131	-1.74796	1.2998	0.704546	0.362529	1.58945	0.643481	2.27987	-0.259104	0.839468	2.81825	1.46376	0.987488	-0.927349	-0.581116	-0.196421	-1.88039	-0.159049	-1.33204	0.86644	-0.258871	0.358242	-2.06323	-0.345675	1.83057	-0.506623	0.27923	-1.81947	-2.36587	1.00675	1.55766	-0.474629	-0.253807	-1.94112	0.292534	1.14774	2.69838	-1.24829	-0.580518	-0.571206	0.287356	0.723567	1.13922	-2.02752
arachidonyl_carnitine	0.199823	-0.596148	1.39931	1.45675	0.751019	1.06988	2.09745	4.22513	1.40206	1.96748	0.899117	1.55141	1.60969	1.20658	3.05553	1.2868	1.04336	1.15961	1.00508	0.58789	0.39026	-2.18175	1.81861	1.53705	0.270166	-0.618877	-0.709231	-0.951752	-0.956924	-1.03093	3.20735	1.9499	1.78199	3.46423	0.288295	0.334062	0.893382	-1.12286	1.44883	1.83643	1.02784	-0.843044	2.88276	2.94803	-1.70125	1.51224	1.73857	0.690207	3.06977
arginine	0	0	0	0	0	0	0	0	0	0	0	0	0	0	0	0	0	0	0	0	0	0	0	0	0	0	0	0	0	0	0	0	0	0	0	0	0	0	0	0	0	0	0	0	0	0	0	0	0
beta-alanine	0	0	0	0	0	0	0	0	0	0	0	0	0	0	0	0	0	0	0	0	0	0	0	0	0	0	0	0	0	0	0	0	0	0	0	0	0	0	0	0	0	0	0	0	0	0	0	0	0
betaine	2.34149	0.919774	0.613416	0.846782	3.12459	2.67436	1.34891	1.76582	1.90066	0.650296	-0.157569	0.585592	0.637047	2.01535	-1.52101	-0.728259	2.81242	0.688169	0.732166	0.607624	0.652959	0.774295	0.687167	0.255928	-1.24633	1.64184	1.50419	1.10871	4.07869	0.0109528	1.28472	2.82385	-0.117738	-0.158223	-1.73488	0.56867	2.4539	1.28016	0.754476	2.07166	0.925837	0.431926	1.79162	1.27376	1.64041	-0.33896	-0.788929	0.45417	2.23274
butyrobetaine	-0.091858	0.770486	0.653574	2.54782	-1.23539	-3.59558	-1.19036	-2.72594	-0.624215	-0.20045	-0.0942028	0.484631	-6.44811	-4.12818	-11.8896	-4.08195	0.549212	-0.107475	-0.344257	0.0444517	0.172206	0.154118	-1.41724	-0.888591	1.89452	-0.0743215	0.174072	0.316711	1.32206	-0.886207	0.885191	-0.191711	-1.09882	-3.51507	-6.72923	-1.24063	0.917697	-0.0375833	-0.153608	-6.29207	0.460446	0.404809	-1.92634	-4.02707	0.813585	0.0448079	-1.60077	0.380657	-3.74886
C14:0 LPC	0.317329	0.594422	0.00816726	-0.301667	1.13277	0.0521299	1.06951	0.264461	1.44017	1.16689	0.64445	1.0974	1.51847	0.638752	0.432138	0.817202	-1.70199	1.52564	2.16055	0.05868	2.18707	0.567557	1.18817	2.39345	2.86029	0.557235	1.51995	1.80704	0.689302	0.758436	0.871711	0.663525	0.508248	4.06421	3.08389	0.853525	1.2715	2.19349	1.63251	0.434086	1.03708	-0.0570334	1.58898	0.391314	3.14185	2.31761	0.564202	0.0390724	2.75687
C14:0 SM	1.06236	1.72876	1.45699	-0.0425501	1.44018	0.829048	1.73639	0.263009	1.21274	-0.229562	-0.293084	0.157132	3.06019	-0.0281539	-0.15467	0.508407	-0.149194	0.651649	-0.22829	-0.404124	0.655627	-0.136039	0.0474501	0.708251	0.586606	1.05592	0.448157	-0.665457	0.692805	-0.439435	0.0165917	-1.21897	-0.129902	2.29277	0.13801	-0.447573	0.479714	-0.146365	0.627136	0.0551078	-1.32793	0.443361	-0.0609163	0.123165	-0.0309789	-0.497585	-0.905501	0.094521	-0.735575
C16:0 CE	0.92926	1.38397	1.71424	-0.220222	0.907067	1.41586	4.17519	2.57722	1.35662	0.602436	0.0367559	-0.390271	1.63819	2.66262	3.62413	1.05743	1.73748	1.22304	-0.313802	0.764338	-1.11219	-1.95375	0.766482	0.939477	-1.81371	1.59095	0.404067	-0.572661	1.8186	-0.392157	1.41039	1.90079	0.381836	-1.39817	-0.817641	-0.956667	2.02013	-1.23806	1.87718	0.828381	0.25118	-0.812981	-0.0858633	2.19048	-1.67396	-0.924433	-1.81856	0.52278	0.734386
C16:0 SM	0.935087	1.13597	-1.1704	0.66352	0.850235	2.94048	-0.861565	-0.0682343	1.08746	1.95378	0.571694	2.76764	1.2631	2.81666	-1.49485	0.839265	0.00804995	-1.02518	2.26337	-0.765658	0.659485	-1.24756	1.62394	-3.22921	0.578291	-1.16067	1.4199	-0.957113	0.082392	1.04271	1.44585	-1.14214	0.479765	2.39535	1.80764	0.0516073	1.22899	0.908449	-1.78617	0.5999	0.636438	2.76635	1.54154	-1.85795	1.22732	-1.13083	0.285414	-1.42513	1.43801
C16:1 CE	0.82593	0.389939	0.283956	0.00187944	-0.0728765	0.479913	4.09819	3.00676	0.944828	-0.848789	1.97983	-1.97153	0.892619	2.0457	3.43868	0.0430637	1.74933	2.35434	-0.977076	1.18585	-1.79777	0.310518	-0.925739	-0.596878	-1.14585	1.31156	0.516005	-1.20621	1.92029	0.604207	1.572	1.2365	-0.331485	-0.929687	-0.97098	-1.36619	1.5448	-1.1546	1.43889	0.542319	0.235447	-0.363335	-0.728662	1.85075	-2.34027	-0.50328	-1.89198	1.13795	-0.352565
C16:1 SM	0.588682	0.415727	-0.0414953	-0.337241	-2.00495	-1.0533	-0.0834978	0.146954	-1.28896	-0.681427	0.035155	-0.0317718	-0.425723	0.2102	0.475212	0.687741	-0.107066	-1.13876	-1.01003	1.34556	0.923623	-1.15419	-0.394473	-0.58417	2.79956	-1.25601	0.903965	-1.8067	-0.445982	-2.23298	0.149042	0.526091	-0.172768	0.35635	-0.466427	-1.12441	-2.18752	0.0468027	-0.795328	0.403455	2.53949	0.400035	0.243852	-0.545433	-0.532511	0.689112	2.1359	-1.91686	1.10294
C18:0 CE	1.2146	-0.540719	0.759126	-0.27919	-1.32182	-2.61665	-4.1633	0.57537	-0.0709573	-2.4382	-3.98706	-1.83974	-1.64797	-2.40538	-1.2494	-0.990909	-1.2479	-0.58551	-0.85538	0.49345	0.900811	-0.947575	-1.50613	-1.02177	0.667901	-2.15582	0.296446	2.00126	1.25666	-0.725794	0.643922	-0.928489	-0.22931	-1.76839	-0.807882	-1.92964	-1.65297	-0.3826	-1.04853	1.31089	0.956405	0.644611	0.909809	-2.14793	1.73254	2.3647	0.57857	-1.14011	-2.62889
C18:0 SM	1.23793	-1.20489	-0.365505	-0.0186794	1.32822	0.392993	-4.53538	-1.16618	-1.89384	-2.19796	-1.61509	-2.89948	3.16037	1.65432	3.10584	3.00084	-1.41916	1.71745	0.801584	1.30937	0.0726245	0.682216	2.0288	1.41071	-1.53602	1.23882	0.328942	1.54387	-0.694008	1.77788	-0.127898	2.5116	0.631491	-1.81557	0.104306	0.480563	-4.00108	-2.79332	2.36481	-0.0762108	-0.066311	1.00816	0.14893	4.30051	3.04556	2.70429	0.565733	2.11339	-0.579886
C18:1 CE	0.46881	-0.277277	0.677906	-0.437706	0.249766	-0.0313004	2.89584	3.45355	1.28667	-1.13948	-1.71784	-1.66072	0.345762	1.64069	2.55648	1.07815	-0.11277	1.26582	-1.73793	0.154447	-1.8691	-0.211838	-1.86685	-0.202096	-1.41301	1.08868	-0.180143	0.121294	1.1783	-0.0483924	-0.357267	0.0799292	-1.36036	-0.057476	-0.691006	-2.88895	0.962213	-1.26606	1.39162	-0.870766	-0.274671	0.0766563	-1.51851	-0.50324	-0.530344	-1.44453	-2.31518	-0.514244	-0.704225
C18:1 LPC	0.0926152	0.67493	1.80537	1.34068	-0.181152	0.926103	-2.93926	-1.48254	-0.878914	-0.359715	-0.713497	-0.822335	-3.3967	-1.8285	-6.00083	-2.81472	0.0785888	0.190038	0.883834	0.0918411	0.51553	3.60138	-1.73181	0.34239	-0.448335	1.08508	1.80267	3.87605	0.903433	-0.172851	0.0685953	-0.0258575	-1.1378	-2.00354	-0.728976	-1.72469	0.298971	-0.275658	0.321939	-1.06323	1.93444	3.99679	-2.481	0.373492	0.635564	1.9135	-1.39228	1.46102	0.00500135
C18:1 SM	-0.972285	-0.729776	-0.532623	-1.33022	-1.25962	-1.17517	-1.82305	-1.18705	-1.28387	-2.38247	-1.5504	-5.27202	-2.3161	-3.03337	-2.13244	1.3383	-1.47625	0.272525	-1.70947	-0.0506458	-0.757748	0.757168	-3.59478	0.514086	1.91165	0.318583	-0.279447	1.58661	-0.704157	0.586684	0.1539	0.928029	-2.15083	0.894524	-0.447874	-1.33155	1.60878	0.791639	-0.260785	-2.01648	0.956709	0.697055	-3.38749	0.041346	-1.6915	2.34927	0.3982	0.0909524	-0.792199
C18:2 CE	0.399232	1.67478	0.867152	1.64715	0.212939	1.56103	3.31204	1.45122	0.608146	0.111358	-0.0794347	-1.87087	0.26245	2.28549	1.32171	0.510604	0.344334	0.768806	-1.22897	-0.554729	-0.76455	0.302135	-0.111358	0.668771	-1.1556	1.56889	0.476169	-0.172434	2.61403	-0.456728	1.32974	0.0714759	1.14072	-1.34386	-1.48178	-1.35225	2.57545	-0.196158	0.0559547	-0.0136075	1.06742	-0.0220799	-1.40585	0.290061	-0.479667	-0.672508	0.389172	-0.0222653	-0.590584
C18:2 SM	-0.357345	-0.547488	0.311315	1.09916	-3.41602	-5.41281	-1.11274	-2.03401	-0.0938989	1.62309	1.30187	2.32481	-3.85692	-4.65445	-6.22009	-3.56521	2.59639	-0.568582	-0.0254812	0.595237	-0.9878	-1.72967	-1.61372	-2.17726	-0.941137	-0.509333	-0.477272	-2.31396	-0.687466	-1.63461	0.853957	0.502165	-0.493754	0.484142	-2.13565	-1.83771	-4.4781	-2.57612	-1.14162	-1.38798	-0.710433	-0.747446	-0.252843	2.26332	-1.46069	-1.01221	-0.519614	1.98453	-1.45765
C18:3 CE	1.01595	-1.41342	-0.593302	-1.40646	0.382168	-1.96083	0.0866702	1.14091	0.648126	-2.17804	-2.40437	-1.04187	0.223396	-2.50474	-2.42279	-0.269189	-2.06465	1.05968	1.50878	0.12268	0.45351	0.957199	2.0401	0.225829	0.218338	1.88731	-0.727315	0.898939	-1.12949	-0.74123	3.17411	-1.44087	1.12834	-2.74999	1.89681	2.08829	0.486606	-0.147147	0.474506	-0.291834	0.579873	-1.73099	-2.14065	-0.845916	2.48148	-0.273549	-0.628936	-1.60485	-1.58136
C20:3 CE	-0.328308	0.580761	-1.42502	1.6467	1.7495	1.30923	1.79681	1.99016	1.31432	-0.826819	-1.43659	-1.37118	1.35241	1.09956	1.40436	2.8025	-0.668589	0.198482	-1.04003	-1.04569	-0.397493	1.54652	0.772457	-0.808872	0.928588	-0.764623	-1.14821	0.181316	1.31599	1.0642	0.790103	-1.0054	0.51838	-1.15178	-1.13294	-0.450599	0.339876	1.69572	-0.683216	-0.848321	0.203504	-0.946953	0.245712	-1.71087	0.562381	-0.528022	0.681753	-0.322204	-1.03863
C20:4 CE	-0.174425	-0.372613	-0.635293	-1.86085	0.362799	0.64592	1.62025	1.24891	-0.344147	-1.3326	-3.2515	-3.41211	-0.430125	-0.0610727	0.835922	-2.96818	-1.37262	1.24729	-0.954429	-0.0255205	-1.59716	0.828857	0.441547	0.702688	-0.840383	1.30017	-0.38831	0.340243	1.4327	0.525796	-1.3603	1.46808	-0.547782	-1.28549	-1.50998	-0.660849	2.11706	-1.56276	0.484653	-2.05048	-1.62654	0.548754	-3.18409	-0.193686	0.638558	-0.507034	-2.94616	1.23937	-2.15233
C20:5 CE	0.419375	-0.572104	-1.92711	-1.00841	2.10935	4.27477	2.58936	2.59879	-0.418456	-1.43297	-0.759594	-3.01608	2.50252	2.545	5.41384	1.39445	-1.23023	0.801252	-0.235438	-0.319986	-0.105838	1.3058	0.322838	2.38176	-0.107972	-0.202642	0.46991	1.50278	1.42203	0.589538	-0.643331	-0.137099	1.59209	0.18682	0.748512	1.71257	3.27735	1.59127	0.97833	-0.659337	-0.132663	-1.33896	-2.02682	-1.124	-0.317496	-0.582627	-0.721218	0.524988	-1.26421
C22:6 CE	-2.09366	-0.243085	0.00271244	0.849806	0.357077	2.0687	-1.23803	2.57282	-0.788073	0.138029	0.443959	-1.07103	3.25155	2.07564	3.04863	0.267639	0.168341	-0.371596	-2.15064	-0.576128	-1.55895	1.32556	0.240855	-0.879327	-4.53773	0.150907	-0.50422	-1.98143	-2.96741	0.845393	-1.81993	-0.0905519	0.493944	-2.35727	1.9855	0.36336	0.00837091	-2.25974	1.21255	-0.691677	-2.46001	-0.774985	-3.2245	-0.0909707	-0.490877	-2.10668	-2.70936	0.912674	-3.8265
C24:0 SM	1.13765	-0.472068	-0.537233	-0.0601938	-0.850827	-1.6513	0.764822	-0.620595	-0.753023	0.336643	-2.98818	-2.18574	-1.36456	0.437888	0.0670047	-0.654376	-1.89433	-0.119333	-1.45837	0.013756	1.32222	0.0890477	0.760975	-0.0694067	-1.05185	-0.845469	-0.612815	-0.0772967	0.318208	-1.32058	-1.71986	-0.870156	-0.720377	-1.37626	-1.16615	-0.143507	0.5544	-0.506245	0.120109	0.246205	-2.14007	-2.02744	0.381658	-0.904276	-2.14876	-0.0606885	0.303851	-0.141433	-2.41873
C24:1 SM	0.532975	0.541222	0.2808	0.387075	-2.0252	0.0781105	-0.054197	-1.10098	-0.966144	1.22968	-0.258512	-1.39636	-0.641282	-1.81833	-0.707256	0.0465029	-3.6832	0.13466	-0.859137	1.34166	1.79622	4.17515	-0.733386	-2.01358	-0.256319	-0.143334	1.78257	3.93191	2.8115	-0.0896014	-0.531834	-0.276821	-0.629569	-0.247793	-0.400841	-1.63442	-1.27976	1.55732	-0.60066	0.89708	0.916517	1.96662	-1.74304	-0.932041	1.84446	2.73947	1.94069	-0.104723	0.134951
C32:0 PC	0.393198	0.990505	1.01061	-0.399433	-0.341488	0.435088	0.575751	-0.476235	1.37435	1.26374	0.295372	-0.395258	0.218908	0.434869	-1.62474	-1.62837	1.24649	0.448417	0.519378	0.342666	0.740173	2.90126	2.17086	1.44177	2.45841	0.787315	0.25328	2.84923	1.12533	-0.103029	5.79546	-0.328927	0.949779	3.00814	4.65522	1.90768	1.36681	2.85153	0.698721	2.93914	2.54792	1.12558	-0.207078	0.849422	0.450283	1.15495	1.4636	-0.21254	2.70179
C32:1 PC	-0.892614	-1.73374	-0.942543	-1.01123	0.885486	-0.795132	1.20326	0.183904	0.564072	-0.764408	0.168417	0.132685	-0.483149	0.841608	-0.196251	-0.650131	-1.45942	0.751597	-0.410986	-0.259452	-0.414556	1.12938	-0.552263	1.09282	0.974486	1.21577	-1.45472	-0.168342	-0.92722	-1.74236	-0.408809	0.417554	-1.71404	0.698616	-0.795457	-1.76678	0.860832	-1.53761	-1.33695	0.309978	-0.374271	1.45303	-2.67486	0.586621	-0.487587	1.2969	-1.11181	-0.601709	1.19253
C34:1 DAG	-0.950439	-1.56138	-2.55355	0.00770774	0.970504	0.0569382	0.858944	3.86576	0.533274	-0.27947	-0.90909	0.246109	1.5808	1.15389	2.90629	1.70082	-0.805944	-0.199962	-0.677115	0.13005	0.431397	0.584484	-0.127077	2.06725	0.234381	-1.64359	-0.40021	0.684102	-0.132488	0.373967	0.026333	0.463549	0.665835	4.01185	0.632105	1.04933	3.27379	2.14115	0.146236	1.37024	-0.212693	-1.0808	0.397885	1.01651	-0.210786	-0.852886	0.749866	-1.0038	2.57038
C34:1 PC	-0.361753	-0.332128	-0.594839	0.149603	-0.150158	0.499177	-0.304402	-0.265604	0.0986092	0.688479	0.865908	0.963947	-1.78355	0.936747	1.29379	-1.44236	1.33196	-0.653012	1.79776	-1.42526	-1.65214	-0.40678	0.606704	-1.38176	-0.869708	-1.14484	0.163897	-1.10817	-1.49991	0.936231	1.11559	0.965258	0.900422	-2.57822	-0.897245	0.527063	-1.486	-0.44858	-0.834349	0.873048	0.386942	-0.738041	-0.507493	-1.0553	-0.231092	-1.26592	0.110549	0.606989	-0.865274
C36:1 DAG	-1.16611	0.0802948	0.440477	-1.20137	0.358429	0.338373	1.8325	0.892533	1.46591	-0.0472874	-0.0672072	0.0428283	1.63708	1.86994	0.358503	-0.188042	1.39692	0.232891	-1.74758	-1.14265	-1.13719	1.71873	1.9849	-0.94362	0.179545	0.277677	-0.657593	-0.201063	1.07985	1.3497	0.999201	1.87475	1.20481	1.13891	1.48636	2.27864	1.13335	0.974195	-0.565637	2.2354	-0.346901	-0.806297	0.820299	-1.41398	-0.797044	-0.410583	-1.82678	-0.614545	1.34816
C36:3 PC	0	0	0	0	0	0	0	0	0	0	0	0	0	0	0	0	0	0	0	0	0	0	0	0	0	0	0	0	0	0	0	0	0	0	0	0	0	0	0	0	0	0	0	0	0	0	0	0	0
C36:4 PC-A	-3.24551	0.907398	-0.763436	-1.02533	-0.596366	-0.235157	1.16298	1.03282	-0.386371	-2.91934	-1.09181	-1.37797	-1.79181	0.353266	2.9286	-1.62397	0.532646	-0.565186	0.513862	-1.38732	0.829008	-1.86615	-0.874267	-1.27302	-1.47001	1.61	0.540539	-0.645338	-1.61487	0.734627	1.31252	1.43899	-0.405051	0.524603	0.577797	0.533904	-0.448833	0.927103	0.399018	-1.23089	1.05822	-1.6212	0.484119	-1.43342	-3.5429	0.537134	-0.588409	0.418148	0.59167
C36:4 PC-B	-1.03282	-0.896803	-1.65577	0.439301	-1.10283	-2.82173	-3.40619	-3.54279	-0.705482	-0.355539	-2.19005	-0.875169	-1.33865	-2.0499	-3.29367	-2.6906	-0.517528	1.19738	0.478591	0.493687	0.70509	2.58546	-0.183205	-0.706734	-1.09889	0.215193	0.0736292	1.52536	-0.730715	0.453192	0.502879	0.421672	1.14596	-0.889269	-0.117764	-0.434554	0.615563	-0.823337	1.34648	0.713891	-0.736806	-1.15568	0.683703	0.65595	0.787337	1.8437	0.197735	1.74246	0.259836
C38:4 PC	-0.188864	-1.16232	-0.158899	1.63435	-0.864057	-3.25802	-3.26761	-0.0444441	-1.27755	-3.01138	-2.6742	-2.41536	-1.57972	-3.97014	-4.36326	-1.05966	-0.141801	-0.425083	-0.341286	-1.30284	0.848322	-1.96188	-1.38817	-3.74817	-1.57851	0.901332	-1.1814	-2.19895	-0.852308	-1.73495	1.51531	-1.90253	-2.36892	-3.78309	-2.10143	-3.0666	-4.93204	0.40229	-3.15991	-1.12216	1.54693	-2.5034	0.669435	-3.14537	-2.86518	-0.660015	1.38283	-3.32791	-0.250043
C38:5 PC	0.0837192	-0.276099	-0.510071	-0.167016	0.527099	-0.126969	-1.28437	-0.876722	-0.229422	0.424996	-0.0649298	1.21486	-1.14207	0.030235	3.12936	2.97908	-0.37369	-0.673648	-0.393501	-0.355006	0.429436	0.25444	2.93063	0.363968	0.905701	0.551125	0.977488	0.584136	-1.04982	0.151202	0.805775	-0.169219	-0.210107	0.683203	1.81414	2.09271	-1.88728	0.177783	-0.453956	1.13178	0.195764	0.182679	0.688105	-1.02166	-0.139551	1.00779	0.629683	-0.230189	0.221188
C38:6 PC	-2.02969	-0.106443	0.486451	1.04844	-1.1122	-1.00023	0.0669736	-0.633794	0.398769	-1.90113	0.242893	1.14885	0.837387	-0.918073	-1.36281	-1.27632	2.61433	-0.558937	0.289219	0.621626	-2.77341	-1.41504	0.32987	-2.94377	-0.561425	-1.86237	-0.553121	-1.02168	-0.47244	1.46755	-0.377715	0.668433	0.377399	-1.27313	0.333533	0.0869954	-1.2685	-1.15495	0.436752	-1.61278	-1.13607	-0.881018	0.155974	0.728734	-2.19272	-2.26026	-0.931148	0.713538	-1.23971
C40:6 PC	0.5687	0.716479	0.161077	-0.681552	0.656269	0.552979	0.65867	0.441719	-0.0906075	2.34549	-1.73449	0.320535	0.280032	0.318195	-2.09026	-0.22803	0.302267	0.720785	0.556113	2.66084	1.91128	0.73232	1.64788	1.07063	0.690281	0.382665	0.605962	-0.195122	-0.533109	-0.419816	1.79525	0.747375	1.38232	3.39094	-0.228404	-1.60777	-0.212553	0.900491	0.0954449	-0.513769	1.54994	1.21892	-0.127532	0.359363	1.16509	0.54003	-0.165382	0.0698604	0.302571
C46:0 TAG	-0.389154	-0.282096	0.551961	0.530383	0.426582	0.312342	0.664572	3.23641	0.953441	-0.789281	-0.287794	-1.25724	2.06994	1.48846	2.53397	1.73409	-1.98279	1.43021	0.605769	-0.121735	-0.255516	1.4738	2.25561	-0.609083	1.20041	1.71334	0.829207	-0.132729	0.32583	1.51874	-0.682991	0.674462	2.23681	0.175671	2.53179	0.525507	-0.345199	1.03653	-0.844039	-1.20522	-0.506947	0.622365	-0.269248	0.65455	3.59915	0.00955777	-1.10586	-1.5686	0.235254
C46:1 TAG	0.506365	1.90553	0.599489	1.85335	-2.6939	-0.820118	-0.625962	-0.976674	0.102992	0.305801	-0.684286	1.10601	-0.990772	0.160336	-3.6486	-1.64445	0.123811	0.837434	0.139797	0.748708	-0.54868	1.22554	-1.563	0.787123	1.02768	1.00657	0.557006	1.84442	-0.665767	1.30656	1.29364	2.69708	1.48234	-1.2412	-5.39056	-1.29613	-2.78333	0.388566	0.493356	-1.39244	1.74238	2.61649	1.48011	2.38929	-1.31733	2.17814	-0.0306011	1.28418	1.29672
C46:2 TAG	0.126275	0.280402	1.47969	1.4566	-0.511218	-3.30239	-2.46652	-0.958728	-0.201601	-1.00103	-2.53836	-0.462441	-4.62475	-3.64014	-3.747	-3.33122	0.152246	1.32057	1.13143	-1.07827	-0.804252	-0.895613	-2.70037	-0.692946	0.142739	1.88551	1.21155	0.614951	-0.983325	1.3334	0.876979	0.689322	2.26614	-0.78969	-2.51547	-2.06796	-4.65714	-1.28052	-1.76212	-2.75505	0.329559	1.23494	-1.02789	-0.0200294	-0.598072	1.2931	-1.03465	-1.34537	-3.24016
C48:0 TAG	-0.915798	0.533715	0.53067	-0.303517	1.97728	4.75445	2.66746	4.65973	0.517902	0.417961	2.40373	2.09731	1.91196	2.23769	2.15011	3.10615	0.709715	1.63065	-0.313376	-0.428758	0.0361719	-0.227315	0.333134	1.99418	0.916861	0.416527	-0.285775	0.151475	-0.155837	0.740876	0.495445	1.88221	-0.293834	3.86633	1.30668	1.80019	3.13883	0.997903	2.26182	1.1465	0.494948	-1.21198	0.458812	2.38407	-0.659105	-1.90087	-0.0813314	-0.83199	0.497868
C48:1 TAG	-1.47102	0.20785	0.00543424	0.440037	-0.65152	0.372255	0.825275	2.24701	2.33444	2.87481	2.34399	2.82759	1.8783	1.74521	1.39353	3.26018	0.993032	0.236337	0.94763	0.565571	-0.954494	1.25508	0.145741	1.69285	-0.361849	-0.0730637	1.17672	-0.113212	1.44601	1.05285	-0.687179	0.325634	2.11269	1.91167	0.477198	1.14959	0.765162	-0.626901	0.252183	0.46849	-0.0692733	1.15471	0.379267	2.50126	0.575571	0.265113	-1.72627	1.6964	2.00515
C48:2 TAG	0.885818	0.731033	0.832797	1.82104	-1.3115	-2.20708	-0.615258	-2.95699	1.38137	1.61968	3.82332	3.28716	0.223798	0.311135	-2.97414	-0.723128	-1.08215	-2.15763	0.238302	-0.165641	-0.746733	-0.680681	0.351107	0.0512969	-0.183816	2.45344	0.441937	1.59667	-0.301683	0.831626	-0.686169	0.789424	3.09832	-0.436132	-2.81421	-1.54895	-0.629279	-0.583426	0.411949	0.188442	-0.328602	0.451907	0.160434	0.891241	1.07589	1.05661	0.249964	1.44394	0.853006
C48:3 TAG	-0.229548	0.97026	2.90961	1.29207	-2.21635	-2.20974	1.156	-1.58183	0.853028	2.69936	7.10318	5.47298	-0.235629	0.267379	-6.57565	-2.35532	1.03412	2.67066	0.949943	2.00384	0.173355	3.98104	0.992186	1.80908	-0.602641	2.05414	0.866625	2.65805	-0.0164034	1.53594	0.157206	1.88087	5.03404	5.38563	2.00209	-0.964076	1.50354	-0.200384	2.11012	0.507993	0.0614176	4.88037	1.54698	5.16819	0.972456	2.16986	1.03537	1.86547	2.40408
C50:0 TAG	-0.463369	-0.550015	0.569483	-0.655979	-0.203121	2.06307	-0.557003	0.867044	-1.05772	2.03489	-0.583441	-0.52656	-2.06814	-0.789271	0.0166259	-0.172329	1.68535	-0.79853	1.10646	0.808891	0.615555	-3.66278	-0.195274	-1.70388	1.11604	-1.15328	1.16531	0.573885	0.643589	-1.93875	3.87078	0.623398	0.253684	-1.97804	-0.240039	-1.00041	-1.56781	0.221488	-1.67129	0.500622	0.196457	0.480951	0.721609	-0.418933	-1.02394	1.5999	0.906139	-1.78941	3.92322
C50:1 TAG	-0.332123	0.62791	0.451198	1.05956	0.500016	1.13315	1.99217	4.09918	3.97834	3.2255	3.06756	3.90329	3.86552	3.90201	4.2293	4.85772	0.636849	0.57579	0.849135	0.147937	-1.70355	1.18166	0.122805	1.63811	-0.592145	-0.156442	0.849688	-0.0826295	1.49528	0.475889	-1.13951	0.232416	2.26083	3.72311	1.74568	1.99474	0.955094	-0.527729	0.515174	1.30768	-0.846618	1.16868	0.541548	2.91033	0.817003	-0.570704	-0.765255	0.0397042	2.14915
C50:2 TAG	-0.20468	2.18301	2.88163	1.73697	-1.47186	1.39171	2.02098	1.96856	1.43332	2.88115	5.00043	4.12541	4.6275	4.60854	1.3043	2.19468	0.198754	0.697279	-0.8585	-0.24971	-1.29496	2.20809	-1.82152	0.768701	-0.284633	0.167577	-0.0639415	0.0180848	0.523924	1.45546	-1.23213	0.166177	1.85858	2.93627	1.74571	0.370805	1.87283	-0.0998962	1.47454	0.113771	-0.0985232	2.52965	-0.418325	2.71587	1.01191	0.205956	-1.52403	1.40683	0.166131
C50:3 TAG	0.270152	1.46386	3.01756	0.80331	-1.21568	-2.07168	0.0291137	-1.95063	1.62846	2.7833	4.93998	3.83654	-1.10203	0.0951211	-7.70575	-2.69168	0.543495	1.21593	1.78864	0.574958	0.354885	4.87348	0.903103	-0.865032	0.0924404	0.307723	2.50893	2.78042	-0.555066	-0.367854	1.01266	0.771538	3.83085	4.85111	2.73971	-0.358106	-1.81106	0.119789	0.167243	2.65043	0.24085	4.70722	1.1962	1.46091	1.61294	1.09571	1.16463	-0.213806	2.74832
C52:1 TAG	0.107764	0.08721	-1.35323	-1.43513	0.240597	1.69243	2.45085	1.323	0.00718043	0.990243	0.694003	0.793516	2.74854	2.06004	5.25645	2.81566	-1.00875	-0.29325	0.387932	0.369721	0.665798	1.77948	-2.07829	0.62303	0.619885	1.91893	0.392823	0.709277	1.32561	0.635687	-0.651549	1.16887	1.34038	1.48348	1.90984	1.66957	0.711079	0.869892	-0.252635	2.41358	-0.132002	0.699843	0.861609	0.457113	0.617254	0.0514824	0.220305	0.171117	1.41628
C52:2 TAG	-1.15449	2.50734	3.37701	0.766107	-2.00827	0.111027	0.81135	0.680726	-0.310725	3.94674	0.747097	1.14261	0.324966	4.47192	0.710383	-1.23248	0.354738	0.346562	-0.973868	-1.04909	-1.96247	2.52463	-0.594799	-0.426905	-0.389232	0.616561	0.0473123	-0.945548	0.144718	1.45203	-0.752101	0.81759	0.0332186	-0.872243	-0.135929	0.325159	-0.103461	-0.100071	0.415099	-0.0987066	-0.470707	1.10427	-0.598756	0.409065	-0.103783	-1.45053	-2.5821	0.679002	-2.85328
C52:3 TAG	1.75713	1.41333	1.65773	0.208618	-0.710763	-2.82972	-4.1577	-2.72952	5.50513	2.17316	12.0306	9.0846	-0.128298	-0.445296	-3.59424	-2.0305	0.947492	-0.938282	1.36518	1.97534	0.835782	0.913595	-1.38063	0.159363	2.11452	1.2752	1.00652	2.42801	0.592137	0.186298	4.06832	5.52601	6.3298	7.00264	4.75278	-0.527776	-3.05341	3.16645	2.04915	11.0822	4.4722	8.62493	5.17117	3.81904	3.42465	4.34405	2.78804	2.08725	9.43729
C52:4 TAG	0.311474	1.30998	2.62297	-0.124741	-0.559264	-0.866004	1.38915	-0.37475	0.403192	2.21396	0.909519	0.434146	-1.83824	0.240161	-7.46958	-2.73422	0.415127	1.01056	1.8147	0.23112	0.533378	4.87175	0.825884	-1.66512	-0.0058692	0.0546992	3.07831	1.77944	-0.0634479	-0.762081	1.00959	-0.759513	1.07368	2.3409	1.63327	-0.23798	-2.12299	-0.07766	-0.523341	1.02071	-0.153363	1.63722	0.184814	-0.644269	0.805424	-0.148734	0.823286	-1.63604	0.869867
C52:5 TAG	1.3682	0.0618279	-0.0067116	0.212569	-0.554464	1.14211	0.528482	-1.08948	1.11992	0.0368144	0.5393	1.81985	1.5392	0.546272	3.13288	1.92386	-0.303768	-0.0685498	0.0324268	1.06132	-0.152142	0.368016	-0.149345	1.46606	1.06777	-0.14089	1.02808	-0.0238068	0.810138	0.100594	-0.924806	-0.994148	0.335153	1.05993	0.914595	1.11657	2.29453	0.916286	0.250146	0.158517	-0.0510535	-0.0289011	-0.278966	-1.3988	0.581023	0.19877	0.16707	-1.32403	1.02278
C54:1 TAG	-0.0878994	-0.346311	0.29136	-1.54125	0.613572	0.378294	3.12042	1.98161	0.636207	-0.52464	0.910082	0.131004	2.04122	1.26506	4.75756	1.75647	1.01909	0.394625	-1.26041	-0.00181409	-0.486434	0.33225	-0.668117	0.917	0.365709	-0.625859	-1.6549	0.0971284	1.77656	1.55991	0.273099	0.71228	0.79598	0.148523	2.28822	-0.25268	0.843751	0.679803	0.763335	0.750282	1.11698	0.460047	0.0587529	-0.312569	-0.0909841	-2.06835	-1.85776	1.40835	1.45451
C54:2 TAG	0.51393	-0.604839	0.866898	-0.810386	-0.217918	-0.383183	-1.10804	-1.14713	-0.0468274	1.02497	0.367177	0.337407	1.17891	-0.0949072	1.52957	0.406067	0.417458	-0.957803	0.275975	0.0450008	-0.199871	-0.69501	0.108027	0.258953	-0.440478	0.235241	0.0844891	-0.113411	-0.564829	0.303408	-0.189485	0.010832	0.667677	-0.160985	1.82734	2.54276	0.487789	-0.153564	-0.432346	1.35829	-0.566691	0.855849	-0.56656	-0.299948	2.7787	0.951168	0.975459	0.146981	-0.0109149
C54:3 TAG	-0.0890281	-0.67774	0.0253228	-0.727213	-0.142877	-1.18333	-0.287897	-1.84535	-2.62471	-2.26489	-3.98717	-1.90401	-1.9371	-2.26732	-1.96239	-4.29533	-2.51874	-0.787566	1.40086	0.372808	-2.16062	-0.61046	-2.69313	1.55163	-0.603773	-0.276927	-1.57125	2.27468	-1.62621	-0.375905	-1.3969	0.0135836	-0.429541	0.610269	-0.968191	0.450895	1.54419	-1.59759	-0.193064	-6.0802	-1.23966	0.699155	-3.39151	-0.609458	0.853262	0.212845	-2.79061	0.441241	-3.55929
C54:5 TAG	-0.355993	-0.52384	0.622311	-1.09538	0.625934	-0.459025	0.464088	1.26649	-0.318914	-0.609508	1.18851	-0.893314	0.769509	0.27033	1.35012	1.33405	-1.155	0.07808	-0.35266	0.0909342	0.847682	1.97352	0.172049	-0.0144416	0.0772957	0.41662	0.931519	-0.17129	0.0341035	0.580814	0.00241216	-0.826373	0.474484	0.45732	0.533707	1.05065	0.00302721	0.0986617	0.182988	-1.17771	-1.32528	0.167725	0.274213	-0.0776982	1.7034	-0.00680869	0.0062979	0.0639171	-2.59756
C54:6 TAG	0.191863	0.468599	-0.465164	-0.179293	0.422887	0.885435	-0.518703	-0.914192	0.995445	-0.131591	-0.755123	1.63477	-0.190363	0.149008	-2.00172	0.593336	-0.701702	0.539089	-0.962122	-0.349781	0.933387	0.621565	-1.60286	-0.355877	0.183107	0.630658	-1.72442	-0.21781	0.234639	-0.2264	-1.29392	-1.24089	-0.416799	2.52182	-0.230215	-0.23364	-0.375961	0.808871	-1.46575	0.917688	0.444868	-0.678114	-0.575203	0.257574	-1.73792	1.52352	-0.733315	-1.02478	1.24616
C54:7 TAG	0.84001	0.28388	0.390056	0.286753	0.862988	1.66315	0.492635	-1.57313	2.21889	1.22025	1.51849	2.54047	0.762888	1.63352	0.7249	1.09816	-0.719316	-1.05525	-0.944574	-0.678601	-0.127615	0.0476778	-2.53775	1.50218	-0.253063	0.882209	-0.515673	-1.0507	-0.949198	0.599426	0.564072	-0.283447	0.777586	2.00994	2.95841	0.85295	0.943851	1.05909	-0.153681	-0.463379	0.943677	-0.166193	0.574563	0.134515	-0.907609	1.61963	0.78697	-0.797923	2.21039
C56:2 TAG	-0.805018	-0.450425	1.33446	0.0284899	-0.0409539	-2.23263	-2.69898	-2.00465	0.0237965	-0.434604	0.336064	0.513424	0.387782	-1.20404	-0.834371	-1.14441	-0.613647	-0.504545	-0.609784	-0.868074	0.677164	-0.476876	-1.22741	0.528509	-0.18981	-0.171835	-0.786875	-0.107992	-0.154463	-0.014217	-0.850448	-0.124152	-0.410724	0.628498	-0.0524364	-0.500037	-0.313318	-1.22261	-1.11652	-0.902755	-1.43437	-0.741162	-0.218308	-2.83519	1.07549	-0.0691381	0.846121	0.819755	-1.67203
C56:3 TAG	-0.136268	-1.50268	-0.0699261	-0.766768	-0.556846	-1.27764	-0.183868	-2.27284	0.429391	0.177147	0.708606	-0.200474	0.0161065	-0.78403	0.328236	-1.62969	0.624798	0.337622	0.287345	0.269576	0.280196	-1.16226	1.01866	-0.845388	-0.0976986	-1.33579	-0.110925	-2.79515	0.408064	-0.241541	0.985421	0.623715	0.242406	-0.473751	0.0419095	-0.0765904	-2.58536	-0.518919	0.14278	-0.0651078	-0.0390423	-1.00433	2.31903	-0.737573	1.26761	-1.28199	1.62421	-0.605704	-0.38765
C56:4 TAG	-1.30778	-1.18947	1.35771	0.626168	-0.901826	-0.0135284	0.640123	-0.119362	0.00378962	0.092995	0.456326	1.22854	0.1089	-0.318683	-2.17839	-2.74601	2.07432	0.429179	1.84509	-0.911542	1.25553	-3.01114	0.869532	-0.483053	-0.150087	-0.904433	0.152812	-1.64816	-0.0740828	-1.23287	1.28266	0.694646	0.755737	-1.00439	0.0378891	0.0185728	-2.37483	-0.670249	1.22184	0.329663	-1.12762	-1.67771	0.248437	1.82159	0.0837253	-0.876899	0.553176	1.21095	0.120932
C56:5 TAG	-0.515079	-0.698564	0.712979	0.0815473	-0.0623872	-0.70424	0.502307	-1.78465	-0.225429	0.419553	-0.275373	-0.181661	-1.0171	-1.13314	0.461003	-0.154823	0.4832	-0.0411011	-0.865459	-0.61189	1.01433	-1.15009	-0.242809	-0.379859	-1.32847	-0.119353	-0.248487	-2.03661	-0.427288	-2.46532	-1.63253	-2.62032	1.1069	-1.04693	-0.324344	1.46264	-1.07535	0.933193	-2.05019	-1.21512	-1.3144	-1.7821	-0.437723	-1.2573	0.193161	-1.16129	-1.24219	0.582104	-3.20756
C56:6 TAG	-0.0483392	-1.03868	-1.39127	-0.512697	0.43364	-0.500245	-2.70729	-1.40749	-1.68448	0.183273	-0.270689	-0.281301	-0.0651002	-1.8722	0.303995	1.10868	-1.19415	0.0260647	-1.40807	-0.843712	1.06617	0.105358	-0.526389	-1.70888	-1.04295	-0.757887	0.640457	-0.473674	-1.06857	-0.036031	-1.29162	-0.593479	1.61079	0.293016	-0.407688	2.01127	-3.56678	4.03783	-1.99361	-0.656871	-0.668717	-0.672288	1.10524	0.0506255	1.13778	-0.500195	1.03272	1.18921	-2.30947
C56:7 TAG	-0.87974	1.19225	-1.34699	0.512651	-0.612183	0.400982	-2.64048	-0.721179	0.886558	0.580148	-0.644698	0.209056	-2.46758	-1.1783	-3.09567	-0.618421	-1.63774	-1.17208	1.14386	0.26504	0.889467	-0.546286	0.165668	-0.232658	1.0234	-0.124125	-2.98053	0.00564163	-0.525111	-0.692606	0.243145	-1.07553	-0.706023	2.98906	0.218927	-0.558213	-1.46218	1.9504	-1.89765	1.6093	0.493809	-1.56833	-1.04139	-1.47314	0.237077	1.14564	0.567291	-0.0350384	1.42561
C56:8 TAG	-1.1012	-0.206774	0.137952	-1.56145	0.213522	-0.419482	0.919033	0.585601	0.719748	-0.344228	1.41468	-0.0980621	0.193858	-0.414743	0.0906082	-1.04506	-0.173191	-0.365712	-0.373703	-0.813207	0.616293	0.409897	1.49686	-0.218311	1.95841	0.092792	-0.374487	0.296361	1.39915	-1.08167	2.23234	-0.165074	0.427789	0.326478	2.07735	1.53115	2.66796	3.08564	-0.167075	1.52274	1.20903	-0.345668	2.11282	0.266584	0.934944	0.686017	0.686577	0.188446	2.44942
C58:6 TAG	0.23221	1.4732	-0.834952	1.40158	-0.0893676	-1.45569	-3.09792	-1.91125	-0.825773	0.932439	0.353844	0.603702	-2.52109	-3.53846	-2.69089	-1.26123	-1.79071	-0.66033	1.04846	0.0826213	0.772394	-0.252515	-3.32001	-0.325387	0.469023	-0.354038	-1.31626	1.31008	-1.6882	-0.913446	0.1944	-1.6501	-1.51312	0.839732	0.234601	0.432158	-0.279208	1.06336	-1.42368	-1.15253	-0.872117	-0.973456	-0.410453	-1.86157	-0.78116	0.457511	1.68937	-0.0677475	-0.483338
C58:7 TAG	-1.83875	-0.825296	-0.102299	0.134057	0.24998	-0.807971	-1.73828	-2.77314	-0.124478	-1.59348	-1.68093	-2.07023	-1.21219	-2.05659	-0.400936	-2.16403	-0.335324	-1.09176	0.603161	1.21467	0.878798	1.06849	0.650201	0.290261	1.63005	0.256255	-0.270038	2.62258	0.264744	0.627667	-1.34442	1.54019	-0.0802781	-0.0799186	0.469225	0.903331	-0.984495	1.67874	-1.46946	-0.433108	0.565015	-0.953281	-0.713584	-0.125805	1.06479	0.00174391	-0.229029	-0.564926	0.615913
C58:8 TAG	0.0983912	0.577465	0.476034	0.161558	-0.845487	-1.35295	-5.7318	-5.42668	-0.659278	0.247928	1.13219	3.91369	-1.64365	-2.54587	-1.62187	0.0244906	-2.18683	-1.05752	3.26298	-1.20963	-0.232101	0.0219199	-0.305531	0.657608	-1.31533	-1.6054	0.177947	0.392615	-2.29756	-0.0449945	-1.45427	-0.90745	1.57303	1.89292	2.99876	1.28917	-0.803006	0.436453	0.0571756	-0.969273	-0.337425	0.0871356	-1.84908	-0.526852	1.23519	0.860416	-0.284185	0.282483	-0.688319
carnitine	0.717803	-0.632403	1.65418	0.437975	-1.15465	-2.54791	1.29429	1.0281	0.70066	1.87433	1.87037	3.90769	-1.86226	2.30934	2.28434	-0.865256	-0.268248	0.020833	1.10475	1.379	-1.72578	-0.0590702	0.795605	2.33338	-0.809274	0.235897	-0.652826	-1.46991	-0.551279	-0.0186145	-1.04365	1.83178	1.53968	3.99614	2.06603	-1.74264	2.27119	0.20412	1.521	0.471188	2.18607	1.19749	-0.278967	3.84824	1.81266	0.641748	0.707713	0.517314	-0.327465
carnosine	0.268675	1.29146	-0.139049	-0.191303	1.66939	5.41537	-0.573895	2.03745	0.0684146	-1.48254	-0.285518	-1.32512	0.429632	1.23046	2.60705	-1.45306	1.44995	-0.996248	0.268575	0.947749	1.67855	-1.01452	1.44994	2.47698	-0.144191	0.681933	1.91093	-1.93828	0.153505	-2.6984	1.40932	-0.97016	0.302425	-1.97515	-0.215044	0.497165	3.38945	2.60627	-1.05868	4.30145	0.896175	-2.49144	-0.341984	0.679542	1.23073	0.469221	-1.86766	-0.968983	0.351777
CMP	-0.99057	0.648451	1.48336	-0.709741	0.765669	0.417268	0.659534	-1.7444	2.12783	0.840502	2.49894	1.81867	-0.707699	-2.0042	-3.38714	-1.18636	1.13826	1.27248	2.38075	-1.19802	2.21608	2.08544	1.50857	1.09626	0.638871	0.709925	1.23369	0.850411	0.988899	0.305199	2.38815	0.771817	1.05155	1.46882	0.331657	1.13488	-0.167401	3.42921	1.11408	1.6829	1.06246	1.04245	0.0221026	-0.287188	1.05708	-0.0811312	2.31218	-0.752122	3.08073
cotinine	0.0478552	2.2976	-0.20048	0.850982	-0.224493	1.53076	-0.179288	0.170695	0.775052	1.2981	0.719547	0.761863	0.743112	1.30001	-0.725849	0.570657	-1.15147	1.05009	1.58303	-0.793044	-0.619089	1.06533	1.82437	-0.281067	-1.29205	0.269091	2.36862	-0.774504	-1.11358	0.553585	-0.874358	-0.323003	0.386615	-1.99916	0.207485	0.615615	0.949882	-1.27161	0.600827	-0.777673	-0.673507	0.273279	-1.12159	-1.5456	1.75192	-0.712678	-2.15796	0.439689	-0.0927729
creatine	0.793424	0.198086	-0.108259	-0.688385	2.26103	2.58011	0.106345	2.31605	1.01593	0.260219	1.49	-0.191438	3.80891	1.10476	2.52285	0.549165	0.0732918	0.636592	-0.820325	-0.600215	0.275639	0.00907836	1.73981	0.049901	-0.561982	-3.30972	0.00340448	-0.336215	0.359596	0.0333822	-1.00526	2.84173	-0.0575885	1.13928	1.11054	2.01247	1.44714	0.925483	1.95165	1.37132	-0.0656237	-0.494729	1.23085	-0.0177144	0.451722	1.35655	0.428338	-0.247381	0.0866605
creatinine	0.729854	0.895746	0.250744	2.50957	2.26995	1.82141	1.15988	3.01208	-0.556364	0.0995852	0.197658	1.44107	3.2002	1.95053	3.5041	2.56209	0.78902	-0.0904992	-0.018661	1.54434	-0.433268	0.622354	-0.0987961	1.12958	-0.419117	-0.661916	1.12303	-0.470425	0.502949	1.45406	-0.913603	0.0631763	-0.206105	0.00466992	0.0509268	0.107222	2.50627	-0.568079	0.596731	-0.855799	-0.247815	-0.147013	0.0242345	0.11737	-0.282167	-1.08519	0.433801	0.916114	0.00700259
cystathionine	0.626166	1.44372	0.526631	0.924216	1.70045	3.54681	1.89203	2.36197	0.918673	1.62228	2.40663	0.567142	1.74499	3.51482	0.76454	2.18992	1.12439	0.945656	0.778905	-1.84856	-2.03173	-2.06701	0.402592	1.56342	-0.234117	0.260339	-1.92686	-2.12158	-1.11564	1.22378	-0.733407	-1.30023	1.06138	0.895596	1.61433	1.96949	3.13499	-1.35859	-1.25262	0.649535	-0.360668	-2.27665	0.0941745	0.405151	-1.19588	-2.32771	-2.22716	-0.575766	1.65857
cytidine	-1.23155	1.75651	0.396339	1.71625	-1.98332	-1.96588	-0.776614	-2.32034	-1.4487	1.7675	2.24798	1.16765	-3.21388	-0.45746	-4.28234	-1.30785	1.45608	-0.520327	-0.824956	-0.380847	-0.231225	-2.00964	-3.56765	-3.49397	-1.23215	-0.133686	-2.73593	-2.29119	-1.51998	-1.26869	1.25996	-0.152138	-1.52653	-1.52291	-4.07357	-2.49912	-3.49074	-2.05211	-1.81117	-0.647669	1.42654	-1.50543	1.00887	-0.443221	-2.17719	-0.38708	-0.341679	-1.08307	-3.59364
dCMP	-1.57035	0.801342	-0.826995	-0.635846	2.23979	0.676996	-3.30353	-0.932503	-0.400295	-0.66983	-2.31943	-3.07573	0.406275	-0.433419	-3.7265	-1.61207	0.439334	0.496787	0.0773932	1.10489	1.29517	2.05859	-1.17982	-2.47158	1.76487	1.61436	-0.726387	-2.00554	0.796654	-1.37021	2.7617	-1.57149	0.349929	-1.97477	-0.804216	1.12002	-2.30969	2.53944	0.235265	1.11673	1.81063	1.35289	2.47694	-0.330168	0.443914	-0.660467	1.10849	-1.32497	1.87284
DHAP/glyceraldehyde 3P	-1.27374	-0.60914	-0.623663	-1.37123	1.60827	-0.864182	0.71302	0.68683	0.415151	-0.848256	0.573896	-0.15244	2.74728	0.208832	3.31746	2.72154	1.01537	0.835215	-0.38101	-1.9821	-1.4235	-1.93173	1.22906	-0.573562	0.386572	0.498682	-0.397088	-2.69606	0.140949	3.52455	0.336447	1.27523	-0.733442	0.863705	0.33018	1.61341	-1.28567	0.297927	-1.1609	0.865595	-0.573443	1.42481	-0.324353	1.59894	-1.56253	0.431754	-0.219329	0.804179	1.58231
dimethylglycine	-0.2075	0.473616	1.26561	0.502079	-0.217398	0.701284	-1.29204	0.333425	-1.6112	0.431479	0.275038	0.707972	0.416167	1.00941	-1.11656	1.10727	0.120495	0.439635	1.07882	0.0824549	0.27108	0.0479757	1.88285	-1.16434	0.0307245	1.09779	0.966315	-0.261191	-0.148106	0.327665	0.402115	0.482703	0.294561	-2.01767	-0.101788	-1.83367	-0.870145	-0.286585	-1.62328	-0.0229071	0.181832	0.266289	-0.00486949	1.22125	0.254199	-0.266326	0.125461	-0.569293	0.817853
F1P/F6P/G1P/G6P	-0.0591719	-0.551906	0.0585387	1.08806	-0.873503	-0.952555	0.0201377	0.507847	-0.885183	-0.65253	0.698813	1.08401	-0.0638245	-0.257349	-0.293482	-0.673857	0.952926	0.386763	-0.756019	0.538276	-2.10182	-0.840357	-1.27753	1.48458	-3.10424	-1.64359	-0.451094	-2.04078	-0.437508	1.18013	0.0637372	1.23507	-0.673109	0.668942	-0.345797	-2.29427	-0.602573	-3.72259	0.304067	-0.413708	-1.59894	-1.42	-1.68326	0.168124	-1.10184	-1.67849	-0.644313	0.307451	-1.35584
GABA	-1.60704	0.171231	0.664802	-0.148012	-0.911653	1.26796	1.92962	1.15411	-1.86326	2.37548	1.70734	2.57858	2.30673	3.63738	2.56342	2.09351	0.340273	1.38869	1.28382	-0.554508	-0.438135	0.45284	-1.67777	0.989342	-1.81822	0.943024	-1.64847	0.887747	0.310965	-0.55797	-1.41798	2.05961	0.995761	3.87731	1.84873	0.840502	0.506912	-0.360087	1.27722	0.858869	-1.61343	1.1746	-0.744488	2.67206	-0.981198	0.555088	-0.638533	2.40754	2.72414
glucuronate	0.549488	-1.25911	-2.01362	-0.618216	-0.487702	1.04333	-3.32013	-1.7779	-0.618601	0.00552347	-3.77002	-2.00675	-0.315474	0.312984	-2.39081	-0.0975112	-0.409986	-0.305581	-0.510142	0.414607	1.65199	-0.247125	0.238706	1.27465	0.960785	0.621976	0.485138	0.777871	0.213214	-0.315236	-0.993076	-1.01051	-0.210294	0.281121	0.423886	0.29257	0.775736	0.574981	-0.239212	-0.382325	0.486702	0.115196	-0.235449	-1.28532	1.30716	1.33942	0.242254	-0.0856985	0.201412
glutamate	-2.43974	-0.114825	-0.424638	0.723441	0.750124	0.275814	-4.49593	-0.132236	-1.74427	-3.69628	-4.38343	-3.13145	-2.20107	-2.03094	-1.74085	0.0214068	-1.57275	-1.62908	-0.397051	-1.21142	-1.8036	-1.83711	-0.775001	-2.47248	-0.0605723	-0.483855	-0.446461	-0.54248	-2.22374	-1.24878	-0.583145	0.280708	-3.46784	-4.90926	-3.94626	-1.34995	-3.91367	-1.3006	-1.03737	-1.94857	-2.54017	-1.94145	-2.12537	-2.18643	-2.3384	-0.617317	-0.30026	0.511	-3.99131
glutathione oxidized	-0.05599	-1.14401	-1.14036	-1.29198	1.81199	-0.615891	3.98255	3.61836	0.547372	-1.69243	1.74104	3.64199	4.80637	2.33055	6.13759	3.45532	1.53992	1.19621	1.02478	-1.15883	1.31593	2.62404	5.65168	4.48939	2.60971	0.700074	-0.29683	0.893534	1.48163	4.14377	1.01545	0.509398	1.08307	5.46752	3.19477	4.05949	6.51181	2.88759	0.211776	1.39655	1.47108	-1.81847	1.20322	-1.08103	2.6277	-0.0727853	-0.511712	-0.820501	3.17795
glutathione reduced	-0.665783	-0.387833	1.39906	-0.264646	1.06474	0.356245	2.949	1.54601	1.90352	-1.30424	-1.38297	0.32335	6.35681	4.55838	3.46928	3.42828	1.33338	1.37611	0.956548	0.0741309	0.21146	0.625179	3.70034	1.24679	0.876863	-0.496719	-1.05894	0.163829	2.26732	0.862514	-0.456901	-0.294654	0.505448	1.16956	4.03361	3.75261	1.38966	1.4669	-0.0198051	1.3964	-0.00201152	-3.31529	-0.556379	-0.833854	1.74329	0.00630148	-0.514786	-1.13846	5.07933
GMP	-0.838809	-0.398521	-0.793505	-1.01549	2.40658	0.805304	2.50024	0.913464	0.189313	-0.847116	-0.582389	0.281859	3.12999	1.64413	3.64784	1.15555	-0.755254	0.525121	-0.284921	-0.212313	0.0813126	1.81759	-0.0999892	0.88509	2.41065	-0.582651	-0.119532	0.776607	0.989121	0.0539702	-1.30151	0.145693	-0.0743988	4.00361	2.05228	0.821953	1.79533	1.68274	-0.15753	1.37086	1.16233	0.275243	0.673463	1.48247	-0.351486	0.122737	0.471314	0.225427	3.70079
guanosine	0.158852	0.759489	-1.38037	-0.879577	0.339542	-0.61575	-2.21369	-0.56882	-3.36819	-1.96065	-2.13026	-2.76597	-2.86785	-2.15399	-3.06494	-3.10299	-2.35095	0.147033	-1.7141	0.0494525	-0.807773	1.13042	-0.92122	0.782349	-0.724852	-0.853181	-2.02936	0.412163	-0.474267	1.03965	-1.33335	0.174682	-2.50534	-1.48236	-1.73145	-0.836299	-0.964451	0.861506	0.679007	-0.999201	-1.46774	-0.127985	-2.79599	-2.61628	-0.379756	1.6886	-0.481256	-1.92843	-1.05192
hexanoylcarnitine	2.79546	1.7567	0.555124	0.480253	-2.26067	-0.530277	-1.12571	-0.621547	1.99209	1.87833	-1.45107	1.02322	2.50349	2.85599	1.4471	1.62888	-0.682729	-0.649321	0.256578	0.898126	0.25886	-0.778434	5.0007	1.96041	0.767271	-1.22277	2.07841	1.65253	1.19286	0.743701	1.50463	-0.690666	0.0827491	1.5844	0.216576	1.13359	1.0158	1.97319	-0.411408	2.52572	0.86398	1.99165	0.123464	2.04805	1.32852	1.14707	-1.91363	1.75617	0.533118
hexoses (HILIC neg)	-0.103303	-0.734775	0.0738403	-0.00925113	-0.0142806	-2.16098	-0.190329	-1.6342	-0.0422691	-1.64409	-0.932461	-3.62174	-3.3601	-3.37131	-4.47424	-3.14688	-2.59759	-0.214717	0.868231	-1.05338	-0.176619	0.250453	-0.133732	-0.0325325	-1.12425	0.82943	0.198699	0.330889	-1.97995	-1.21176	-1.15399	-0.139096	-1.41095	-3.34244	-2.0529	-0.451463	1.21976	-1.34113	-0.996013	-2.64263	-0.983694	-0.414973	-0.686551	-0.961023	-0.016903	1.26085	-0.516387	1.08132	-3.64181
hexoses (HILIC pos)	0.512779	0.0948339	-0.195001	-0.139646	0.980276	-2.62657	-2.19634	-3.41919	-0.759438	-1.80202	-2.52828	-2.38855	-3.0596	-3.65577	-4.95384	-4.05997	-2.15129	-1.73543	1.78068	-2.9662	-0.377427	-4.24104	1.38849	-3.2967	-0.280005	-1.80728	-0.0940007	-2.59946	-1.69362	-2.36412	-0.836446	-1.5165	0.0785425	-6.41067	-1.91532	-0.177509	-3.94529	-2.42813	-3.1218	-2.20923	-1.54707	-2.24204	-0.62666	-2.59458	0.00566621	-2.08186	-1.42494	-1.88612	-2.49152
hippurate	-2.63942	2.87596	0.459065	0.108192	0.723331	0.545908	-0.138151	0.0549513	-2.65605	0.177052	0.663421	2.13443	-1.35562	0.447376	-0.165104	-1.02063	0.795882	-3.35458	-0.328645	-2.04211	-0.603035	-2.57135	0.696949	-1.98848	1.90173	-0.626701	-0.798632	-1.63547	0.489454	0.423759	0.641422	-0.635877	0.288615	0.197996	-0.292404	-0.269958	-1.35944	2.85474	1.01117	-0.419999	-0.245311	-4.07546	0.115597	-0.132558	-1.44149	-0.469336	-2.14947	-1.13226	-0.649277
histidine	-1.2853	-1.11814	0.682321	0.311654	-0.179349	1.52025	1.42062	-0.630693	-0.0581101	0.131204	0.863768	-0.95525	-1.00646	2.59113	1.42707	-0.27287	-4.18876	-0.97496	-0.118077	0.225791	-0.291198	-0.396156	-0.342802	0.133052	-1.43787	-0.589401	-0.394576	0.0295348	-2.59609	-1.18982	-2.27923	-0.640531	-0.552758	-0.0750106	0.539738	1.37595	-0.583101	-1.0741	-2.05098	-0.0563451	-1.88199	-0.344143	-1.69872	-1.1166	-1.37547	-1.79405	-1.81549	-0.671185	-0.797537
inosine	0.691242	-0.466217	1.15163	-1.06737	0.892239	-0.824093	-1.3166	0.687793	0.283171	0.0416262	-0.237706	0.530273	0.122509	-0.267519	-2.09158	-0.633066	0.789485	-0.214652	0.442118	-0.352142	0.78971	0.85697	2.76004	1.08034	2.40705	0.100769	0.760499	0.943199	0.113426	0.315969	0.722388	-1.13706	1.86622	0.224087	0.934167	2.12219	0.761195	1.66325	0.00972336	1.67049	1.2535	-0.632615	-0.438226	-0.2808	3.73557	0.575659	-0.188319	0.556741	0.155428
inositol	-1.17877	-0.203597	-0.291907	-0.452502	-1.43585	-1.87359	-0.776408	-0.517177	0.149438	0.338358	-1.1842	-1.04977	-0.543008	-1.1901	-0.990341	-1.6327	0.526499	-1.15831	0.411297	-1.54279	-0.775423	-2.67188	-2.74795	-1.7353	-0.530665	-2.98425	-1.82379	-1.54589	-2.01989	-1.33987	-2.67005	0.426611	-0.292767	-2.50914	-0.693675	-3.26169	-2.97619	-1.17119	0.300079	-0.363869	-1.41757	-2.80035	0.952635	-0.580746	-0.959085	0.488512	0.942562	-2.64173	-0.0696482
isoleucine	1.12756	0.644079	-2.43121	-0.213448	0.0032612	0.164798	0.823966	-1.44698	0.81816	-0.345683	0.409565	-1.92985	-0.529366	-0.221266	-0.273375	1.07579	-1.92693	-0.356699	-1.84307	0.381728	0.845187	0.0280816	-3.37807	0.192341	0.971728	-0.381699	0.847403	1.75428	0.952435	-0.334591	0.350541	-0.379882	0.584526	0.433799	-0.947164	-1.24242	-1.0189	1.8883	-0.862666	1.27634	0.971376	0.00517566	-0.793792	-0.542508	-0.380883	-0.0232182	2.43788	0.191235	-0.633859
kynurenic acid	0.784797	-0.241186	-0.134707	-0.944819	0.28918	2.16396	1.54938	3.24774	1.01495	-1.4722	-0.61367	-2.35779	3.43165	3.22661	4.63819	1.02887	-0.614207	1.06362	-0.321869	0.498023	-1.41885	0.880707	1.50008	2.80606	-1.10965	1.4433	2.25309	0.536527	3.07037	-0.196035	-2.61057	0.1075	1.89155	-1.19844	2.50506	-1.0253	2.14847	-1.59949	0.544291	0.16389	1.04281	0.539119	-3.18997	1.47082	-0.565192	-0.6765	-1.01076	0.864077	-0.863149
lactate	1.07768	1.07996	-0.101747	1.28579	0.933853	1.26349	-0.36282	1.34454	1.94209	0.33764	0.208136	-0.698874	3.21013	2.89798	4.03794	2.64456	-1.87541	0.697442	-1.58874	1.56248	-0.757065	1.60563	0.794104	4.0837	1.85989	0.153056	1.26195	2.29502	-1.08941	1.64633	-1.04328	0.847551	0.513551	0.0494724	2.86643	1.87812	2.16606	1.56434	1.90229	1.89503	1.60807	2.01819	-1.93161	-0.963962	1.39064	1.78514	1.20729	-0.0455787	1.28565
lactose	-2.01159	-1.39225	0.247626	-0.263907	1.95316	-0.620061	1.06534	0.148384	1.96183	-0.471253	1.27106	-0.490912	-0.252981	-1.49546	1.04208	-0.395388	-2.1129	0.211409	0.380506	-1.32002	-1.04522	-0.0229182	1.19904	-1.95696	-1.63893	0.0298362	0.246689	-1.67896	0.765652	-2.17665	-1.58454	-3.15957	0.11173	-1.85052	0.439425	1.07336	-0.888033	1.10815	-0.200808	-0.751883	-1.34025	-0.579604	-2.20582	-2.22581	1.75507	-1.75722	-0.521352	-1.03946	1.25019
lauroylcarnitine	0.273784	-2.11232	1.18403	0.531698	0.486198	-2.1812	-0.516104	-3.41178	1.06119	-0.485084	0.882103	1.94047	-1.6163	-2.87177	-3.3947	-1.7166	2.15709	0.76644	0.0339496	0.0505086	0.784198	0.233142	1.44105	0.822842	0.143319	0.0989993	0.315876	1.53139	0.504424	0.507787	-0.134442	1.72544	2.00766	1.30049	0.25722	1.06585	1.38272	0.435633	2.52619	0.696848	1.53904	0.497979	2.02371	0.952399	1.23594	0.187662	0.259643	1.27389	-0.37294
leucine	0.155219	-1.53849	-0.610003	0.011662	-0.465767	0.364167	0.899732	0.631198	-0.279637	-0.797197	0.228622	0.193723	-0.627835	1.95705	1.76102	0.802957	-4.67527	-1.0534	2.17443	-0.0896679	-1.29893	0.110806	-2.49882	0.0675808	-1.07621	-0.201786	0.586009	0.150277	-1.85355	-0.316765	-1.94788	-1.03721	-0.228875	0.15378	0.734859	0.616628	-1.27492	-0.267215	-1.98391	-0.75617	-2.40494	0.13221	-2.20883	-1.36773	0.594343	-1.86496	-1.3378	0.273413	-1.83768
lysine	-0.192793	-0.975349	-1.03765	1.43246	-0.0599169	-3.16951	-1.31578	-2.55711	-1.65825	-1.42895	-3.75416	-2.7481	-3.51158	-4.64395	-5.93007	-3.05603	-1.40531	-1.08862	0.893429	-3.55875	-1.06278	-4.81691	0.7388	-3.92559	-1.70148	-2.05775	-0.803264	-3.76742	-2.41282	-2.75224	-1.5651	-2.39373	-0.287823	-6.84478	-3.01552	-1.27026	-3.69612	-3.26248	-3.2429	-2.42191	-2.62595	-2.89656	-1.71588	-2.95829	-1.57852	-3.67589	-1.98961	-1.88515	-3.80664
malonylcarnitine	-0.564686	0.142756	0.244403	2.83753	-0.605402	-3.02611	-0.489136	-1.44523	-0.17892	-0.0347584	-0.378013	1.02235	-5.11532	-3.13518	-9.13867	-2.81522	-0.0408209	-0.131216	-0.333269	0.216153	0.497508	0.21519	-1.49961	0.2095	0.610603	0.355883	0.0721202	0.965027	0.964812	-0.619957	-0.11435	-1.06927	-1.06251	-2.68593	-4.15865	0.0487503	1.58116	0.1472	0.0854981	-4.42544	0.0905565	0.754383	-1.04139	-3.38687	0.603336	-0.207372	-0.446975	0.042677	-2.47185
methionine	0.932165	-1.04678	-1.73645	1.46009	-1.53151	-0.790924	-1.14242	1.23119	-2.05381	-0.911103	0.920317	0.305161	-0.0462201	-1.12804	0.395489	1.91596	-2.63228	-0.356451	-1.98707	-0.331268	-2.84868	-0.401721	-5.00764	1.92216	-2.24906	0.672974	0.887218	-0.273754	-1.45909	1.00082	-2.79976	-2.28129	-2.5285	-0.862106	-1.13117	-0.615333	-0.636391	-2.31311	-0.852359	-3.31225	-2.83966	-0.80573	-3.75152	-2.24371	-0.682161	0.621871	-0.613068	2.54817	-4.64636
methionine sulfoxide	-0.132766	0.0321532	-1.1852	-2.45856	1.69246	-0.0861962	-1.20192	0.426726	-0.0477449	-0.0136895	-0.161731	-1.82126	-0.447592	-0.194404	0.0858846	-0.854032	-1.39255	0.376329	-1.05127	0.0622601	1.72389	1.94971	1.74147	0.727529	0.482659	-0.204861	0.520014	0.478592	0.553178	1.24557	-0.687287	-0.134494	0.307048	0.484021	0.0658816	1.15844	1.31041	0.870595	-1.99575	0.0079458	0.588895	-0.598946	0.604314	0.126785	0.733561	0.526513	-1.105	-1.06246	0.166993
myristoylcarnitine	0.0749479	-2.4891	1.3824	0.882408	0.404735	-1.69031	-0.568171	-4.18449	1.05584	-0.0433939	0.826534	2.52072	-1.96398	-3.71635	-3.99353	-2.06603	1.16837	0.386994	-0.198722	-0.587835	1.12167	-0.544989	2.31317	0.426376	0.163958	0.539063	-0.249816	2.18433	-0.188886	0.99204	-0.0494135	3.03315	2.45607	2.68928	1.29143	2.07923	1.9362	0.596153	2.52526	1.22942	-0.439431	1.28716	1.9533	1.64978	1.35874	0.695697	0.466271	2.16948	0.29342
N-carbamoyl-beta-alanine	-1.74667	0.235564	-1.31076	-0.551072	1.18704	0.225847	0.633111	-1.24064	-2.16639	-1.96102	-2.45907	-2.75179	1.57463	1.41585	1.49901	-0.462804	-1.06487	-0.890257	-0.360421	-1.7584	0.46436	0.505612	0.473468	2.38065	-0.402557	-1.12853	-1.4431	-0.0389408	-1.28181	1.69397	-0.732451	-2.33102	-2.70197	0.493725	-1.59179	2.87642	1.14726	-0.893492	-0.590768	0.500134	-0.40502	-1.50742	-1.85094	-1.69187	-1.45223	-0.123339	1.60594	-0.362955	-0.887704
NAD	-1.29395	0.36185	1.96294	-1.71656	-1.26705	-0.598996	-0.685251	-0.8981	-0.643373	-1.67693	-2.15715	-3.37039	-1.4166	-2.56904	-2.91979	-0.772841	-0.333241	0.527177	-0.295934	-1.66278	0.214932	1.68219	-0.233963	-2.69239	0.212977	0.463135	-0.683903	-0.193817	0.107913	0.0406148	-1.10398	-1.18977	-3.26972	-4.57576	-1.7481	-0.349212	-1.42511	-0.653997	-2.66394	-0.374066	-2.32271	-0.941516	-1.67758	-8.38698	-0.228129	-1.72761	-1.15304	-0.885102	-1.53875
NADP	-0.982105	-0.883934	-1.05844	-0.862317	0.572802	-0.38326	4.79515	2.99587	0.202783	-3.50166	-1.4746	-0.47412	4.66751	3.69868	6.60887	4.61205	1.22349	2.8328	-1.51743	1.23735	-0.368897	2.14244	3.3558	8.17225	1.97779	0.317025	-2.37402	-0.20549	2.12036	5.92049	-1.82175	-0.672638	-1.74633	2.90481	2.7173	4.73391	9.05413	1.2723	0.195573	-0.224816	-0.302634	-1.72225	-0.746822	0.166263	-2.17839	-0.591465	0.454425	0.174454	1.26926
NMMA	1.04692	-1.3779	0.301209	-0.44048	-2.64125	-0.330447	2.23465	1.40508	0.736638	0.817046	-1.9997	0.810864	0.451304	1.65222	2.1454	0.43042	-1.74632	-0.0699547	-1.9454	0.490957	0.551898	-0.377007	1.98985	2.86919	0.739086	0.345232	0.757559	0.981897	-0.234366	-0.103058	-2.55568	-0.902286	-2.13276	-1.1023	1.05406	0.41428	2.18094	-3.30861	0.0979438	-0.434761	0.195632	-0.502177	-2.31205	-0.768362	0.280311	0.753392	0.723516	-1.49197	0.639104
oxalate	-0.109454	0.74478	1.42269	-0.767669	0.668772	-0.622378	-2.33204	-2.80256	-0.0745977	0.607038	-0.35433	-0.539525	-3.47555	-1.9881	-4.74959	-2.98237	-0.171424	-0.411755	2.13816	-1.12066	1.09126	-2.18156	0.858648	-2.4814	0.372201	-0.891422	1.2766	-1.0223	-1.12126	-3.90797	2.12615	-1.19558	0.389185	-2.82543	-1.32187	0.347163	-4.2921	0.742253	-0.658924	0.648455	0.906592	0.607655	0.936707	-0.685926	0.731223	0.339062	-0.200938	-0.880897	0.893411
pantothenate	0.659276	0.305488	-0.295604	0.462828	-1.86266	-3.39506	-1.53532	-1.10234	-1.10112	0.317655	0.743943	0.433403	-4.20789	-2.78994	-5.36813	-2.26654	-2.04976	-0.323306	-2.343	-4.43336	-2.38993	-3.16735	-7.54521	-1.46145	-1.38905	1.79115	-4.31061	-2.26188	-1.99123	-1.32855	-0.943892	0.132966	-1.35245	-0.613939	-2.00291	-2.53491	-1.39025	-1.64643	-0.814644	-0.655818	-1.34613	-2.06421	-1.64842	-2.38073	-2.46318	-0.760821	-3.68926	1.34743	-3.28871
phenylalanine	0.0349825	-0.401737	-0.160163	-0.223752	-0.324342	0.450703	1.09684	-1.10081	-1.79402	-2.23231	-0.264992	-1.01076	-2.17002	-0.878808	-1.24306	-1.04252	-2.55162	-0.969248	-0.0644673	0.413875	0.123579	0.372667	1.12531	2.18004	-2.13675	1.41602	4.91232	3.47018	0.0739625	-0.0561892	-2.16396	-1.37855	-0.0824209	-1.1576	-3.08526	1.01224	0.613718	-0.208984	-0.44627	-2.45125	-2.26139	-3.20944	-1.40787	0.0119199	0.949188	-0.0317605	-3.81686	0.965821	-4.12734
phosphocreatine	0.967964	0.765643	-1.22907	0.0924002	2.54836	3.0564	4.31242	3.76301	2.61203	1.74481	1.63723	0.0592504	3.65372	3.73833	4.69546	2.37316	2.06483	1.75164	-0.211147	1.26129	-3.00898	-0.935398	2.12642	2.14884	-1.4656	2.76754	0.0273839	-1.01108	1.33918	2.24341	0.867103	2.66061	1.38018	1.53221	0.954158	0.184811	2.85328	0.142881	2.56368	0.867898	0.559822	-1.86844	0.495009	2.49709	-0.321407	-1.21255	-1.47681	0.382745	2.15655
putrescine	0.746746	-0.5348	0.195399	-0.249776	-0.587939	0.0904609	0.1155	0.0307677	0.597343	0.0369459	0.822945	1.16547	2.10883	0.039942	0.852038	-0.91912	-0.161708	-1.09437	1.6867	0.220748	0.0697469	-0.107477	-0.0976729	-0.986283	-0.928243	-0.744644	0.525873	-1.46054	-1.55592	0.353207	-0.266069	-0.467888	2.30249	-1.28774	-0.168315	0.603204	-0.472435	-3.04044	0.273735	-0.90755	-1.00224	0.771998	-0.502914	-0.612391	1.41536	2.45583	-1.10607	0.582894	-0.832714
pyroglutamic acid	-1.07482	-1.97132	-1.77645	0.501046	-0.800351	-2.17743	-3.97006	-3.15381	0.383175	-2.1153	-2.28633	-1.52581	-0.898899	-2.73342	-3.36592	0.446252	0.178159	-1.03614	0.902351	-0.195146	0.879542	-1.84105	-0.923614	-1.02299	-1.69303	-1.48682	0.543405	-1.8755	-0.284427	-0.729165	-1.31959	-1.82381	0.088207	-1.76937	-3.59544	1.39726	-1.38091	0.558165	-0.434793	0.0941846	0.156409	-2.88525	-0.183228	-2.39552	-1.59737	-0.820039	-0.587618	0.689674	-2.7969
ribose-5-P/ribulose5-P	0.265099	0.353281	-0.30109	0.605649	-0.558089	0.781663	-0.331359	-0.0859246	0.822737	0.331676	-0.59021	-2.3093	3.8345	1.24056	1.92821	0.0775935	1.13262	-0.785068	-1.49816	-3.5222	-1.00492	0.470875	-2.1019	-1.64253	-1.30023	-1.53956	-0.876719	-2.90078	-0.799254	1.65817	-1.8879	-1.17915	0.923632	-1.17272	1.33609	-0.0414113	-3.18747	-2.45383	0.87944	-0.490737	-1.75222	1.15057	0.0134544	-0.637117	-2.49702	-3.31023	0.0604784	0.649314	-0.153534
SDMA/ADMA	-0.408032	1.66731	0.842736	0.112775	1.1739	0.676166	2.23537	3.49823	1.20384	-0.0641936	-0.286451	1.20721	1.87934	1.88426	3.12679	0.291622	0.922306	-0.531791	-1.18545	-1.34746	-0.945058	-2.24475	-0.216341	-1.24032	-1.21572	1.76458	-0.300397	-1.93372	1.67906	-0.699787	0.861803	1.22102	0.879407	-1.91002	-0.59782	-1.2665	1.36602	0.492273	1.53795	0.394163	0.838762	-3.52741	-0.786486	2.14651	-0.796859	-1.66849	-2.78561	-0.408613	0.651265
serine	0.430033	-0.536511	0.503857	0.22798	0.284363	-2.52083	-1.67033	-4.20695	-0.93671	-3.26049	-1.27083	-1.06003	-2.27835	-4.79458	-6.68142	-4.38385	-1.16108	0.979688	2.21057	-2.38244	-1.08541	-4.08076	0.409541	-1.61215	-0.34717	1.33377	-0.660839	-1.46976	-1.3531	-0.440775	-0.138102	1.281	-0.257566	-4.53477	-1.91781	-0.883635	-2.73916	-1.96504	-0.534342	-1.52526	-2.42909	1.19034	0.00532685	0.585272	-0.523528	-0.873449	-1.02164	0.942743	-2.3646
sorbitol	-0.199709	-1.93752	-1.54975	-0.695172	-0.00357185	1.67191	-0.816323	1.34049	0.0350184	-0.793432	0.67343	2.24029	0.54304	-1.57839	0.060905	1.8496	-0.948562	0.741502	0.525805	0.7187	1.39911	0.0236714	1.10863	0.824206	0.719217	0.26177	1.62399	0.119932	0.422694	0.404564	-1.54576	-0.00823996	0.74174	-2.20923	2.56654	-0.24106	-1.05642	0.437158	-0.603627	-0.811732	0.0932521	0.314663	-0.987857	0.0175812	0.788434	0.678291	-0.0480795	-0.0857423	0.429193
thiamine	0.16621	0.144942	0.0256388	-1.85938	-0.173855	-0.383767	0.521328	-2.71168	-0.146755	0.5108	-0.428869	-4.67901	-3.06248	-2.14817	-4.28501	-4.91649	-1.32636	-0.479205	0.285417	-0.448734	0.499792	0.159869	-0.760212	-1.67202	0.38475	-0.127841	2.40508	1.46383	-0.316997	-1.87898	-0.447525	0.0395078	0.0975085	-0.612778	-0.579306	0.0942218	0.882673	1.45973	-1.35274	-0.664279	-0.675988	0.0477716	-0.697769	-3.00303	1.24416	-0.889485	-0.981105	-1.59201	-0.231041
thyroxine	1.48344	0.455315	-1.50262	-1.39856	-0.228092	0.136373	-0.297292	0.601082	-0.784197	-0.406883	0.320632	-0.582794	0.505245	0.303447	-0.323553	1.10225	-0.363133	0.089389	0.375263	0.734443	0.48277	-0.502949	0.400684	1.16481	-1.31198	-2.39965	0.275547	-0.30659	-1.31889	-1.39009	0.88247	-0.699769	-1.43828	0.567396	0.667986	-0.505731	0.394942	-1.00178	-0.224008	0.607292	1.01818	-2.28354	-3.08984	-0.388278	-0.904542	0.372787	-1.07878	-2.78669	-0.623833
trimethylamine-N-oxide	0.814492	0.919135	-0.181973	-0.436719	2.0015	3.12707	-0.843431	-0.613774	0.51447	1.98155	-2.59037	0.734879	-1.43267	1.78525	-8.28155	-1.15865	-0.469439	0.347371	0.835983	1.53871	0.0899835	-1.3563	0.113802	-0.902212	-0.222472	-0.49084	2.01193	0.440985	-1.33253	-0.802398	1.26237	-1.13478	1.28869	-1.29799	0.387604	0.363793	-1.23753	0.369769	-3.48411	0.690228	0.236713	-0.553577	0.914013	0.869068	0.11803	-3.64006	1.26972	-1.91307	0.033009
tyrosine	-0.334894	0.363032	0.230952	-1.87869	-0.19261	-0.457114	-2.90262	-1.20561	-0.968714	1.20556	-0.211482	-0.743032	-2.52833	-2.41781	-2.97056	-1.41923	-0.590663	0.646026	0.776889	0.38915	-3.11747	2.04189	-0.773779	-0.29126	-4.83072	1.66545	-0.837762	0.776385	-2.25458	-0.428908	-1.25306	-0.663692	0.273636	-1.02311	0.555163	-0.678424	-0.600145	-1.61976	-0.316671	-2.2041	-3.0689	-3.12599	-1.44449	-1.3151	-0.693271	0.664698	-1.31187	1.40737	-2.49026
UMP	-0.598615	0.772319	1.30601	-0.421732	1.45061	1.36492	-0.798901	-1.88716	0.868268	0.561431	1.64085	1.2072	2.70174	1.1579	1.51336	1.40497	1.39303	0.496665	1.38408	-1.55141	1.86224	0.992692	0.1663	0.814714	1.0356	1.13208	0.495546	0.285229	1.69864	0.518869	3.50779	2.51035	1.09185	1.14553	0.820927	0.653117	0.474946	2.78184	0.686627	2.16946	0.839037	1.3325	2.09886	-0.150297	0.530232	0.301184	2.95175	0.457917	3.26026
uracil	-0.684957	-2.30149	-0.617961	-0.929855	0.532671	1.33644	0.459145	3.12923	-0.17257	-2.02115	-1.29444	-0.378272	3.18013	1.80764	3.24582	0.451951	-2.34383	0.118576	-0.0748922	-0.0821315	-0.393851	1.39879	0.855741	0.893225	-0.501008	0.258178	1.79999	1.20476	0.592754	0.30216	-2.67767	-0.723497	1.03952	0.133175	1.62919	1.84306	1.51776	0.159753	0.597818	-0.0264839	-0.368583	-0.476478	-2.05349	0.201287	0.216286	-0.35435	-0.234654	-0.288909	-1.36475
urate	0.0806652	0.0612806	1.1905	1.16323	0.294141	1.14124	-0.188144	1.08029	0.753319	2.24228	0.519932	3.55197	-0.147832	-1.24748	0.0356141	1.61952	2.54958	0.544508	-0.152253	0.267032	-0.0430302	-0.14809	-0.0840212	0.0279703	2.6878	0.113867	-0.313865	0.02376	0.104273	-0.797378	1.86604	0.726439	0.441519	0.42256	1.42532	-0.415401	0.793977	2.0073	2.0555	0.280304	-0.0272519	-1.19581	-0.122528	0.915094	-0.331078	0.525893	-0.073358	1.30577	0.359944
xanthine	0.380379	-0.556643	-0.175318	0.0256464	0.746812	1.35842	3.3282	2.43786	0.545266	-0.0227263	-0.761362	-1.49677	2.06768	1.55559	2.97145	-1.84056	-0.425818	1.24068	-1.19925	1.40527	-2.85951	0.1717	1.19517	1.90935	-1.68943	0.613963	-0.900625	0.147442	1.87386	0.92211	-2.04028	0.657499	0.492564	-0.704209	-0.255115	-0.152211	2.87167	-2.38113	1.38313	-1.09599	-1.0284	0.0511551	-2.00696	1.10285	0.698678	-0.273842	-1.49441	0.419598	-2.94638
xanthosine	-0.0048325	0.525312	0.956486	-0.102903	-0.904031	-0.539134	1.52167	-0.818684	0.0310396	-1.24429	-1.00697	-1.27778	0.645105	1.29556	1.33211	-1.44415	-0.434413	0.74831	0.278387	-0.0244417	-4.33114	0.419657	-0.805436	-0.159185	-2.53944	0.705404	-0.404991	-0.00368792	-0.704538	0.166271	-0.881305	0.892144	1.48247	-0.0452151	-0.168232	-1.59042	0.737446	-2.27077	1.14272	-0.570176	-1.93604	-0.536411	-0.785858	1.9848	-0.151523	-0.387969	-2.23695	-1.33981	-1.45426
[truncated: 6 more columns]
